# Supplementary material for: Tetrakis(1,2,5-thiadiazolo)porphyrazines. 9. Synthesis and spectral and theoretical studies of the lithium(i) complex and its unusual behaviour in aprotic solvents in the presence of acids
Source: Royal Society of Chemistry journal article supplement (doi:10.1039/c9dt02345c), 2019-01-01
Supplement: c9dt02345c1.pdf [file c9dt02345c1.pdf]

## Supporting Information

### Tetrakis(1,2,5-thiadiazolo)porphyrazines. 9. Synthesis, spectral and theoretical study of the lithium(I) complex and its unusual behaviour in aprotic solvents in the presence of acids

Pavel A. Stuzhin,<sup>\*a</sup> Svetlana S. Ivanova,<sup>a</sup> Mahmoud Hamdoush,<sup>a</sup> Gayane A. Kirakosyan,<sup>b</sup> Aleksej Kiselev,<sup>a</sup> Anton Popov,<sup>a</sup> Valerij Sliznev<sup>a</sup> and Claudio Ercolani<sup>c</sup>

<sup>a</sup> Research Institute of Macrocyclics, Ivanovo State University of Chemical Technology, 153000 Ivanovo, Sheremetevskij Pr-t 7, Russia. E-mail: stuzhin@isuct.ru

<sup>b</sup> Kurnakov Institute of General and Inorganic Chemistry, Russian Academy of Sciences, Leninskij pr. 31, Moscow 119991, Russia

<sup>c</sup> Dipartimento di Chimica, Università di Roma "Sapienza", P.le A. Moro 5, I-00185 Roma, Italy.

|                                                                                                                                                                                                     |    |
|-----------------------------------------------------------------------------------------------------------------------------------------------------------------------------------------------------|----|
| <b>Table S1.</b> Geometric parameters atomic charges and Vyberg bond indices for two considered geometrical configurations of dilithium complex [TTDPA <sub>2</sub> Li <sub>2</sub> ]               | 2  |
| <b>Table S2.</b> Geometric parameters atomic charges and Vyberg bond indices for four considered geometrical configurations of monolithium complex [TTDPAHLi]                                       | 3  |
| <b>Table S3.</b> Geometric parameters atomic charges and Vyberg bond indices for lithate complex [TTDPA <sub>2</sub> Li] <sup>-</sup> and its <i>meso</i> -protonated form [TTDPA <sub>2</sub> LiH] | 5  |
| <b>Table S4.</b> Geometric parameters atomic charges and Vyberg bond indices for [TTDPAH <sub>2</sub> ] and corresponding dianion [TTDPA] <sup>2-</sup>                                             | 6  |
| <b>Table S5.</b> Geometric parameters atomic charges and Vyberg bond indices for monoanions [TTDPAH] <sup>-</sup> and {H[TTPA]} <sup>-</sup>                                                        | 7  |
| <b>Table S6.</b> Cartesian coordinates of atoms and total energies for optimized molecular structures containing TTDPA macrocycle                                                                   | 8  |
| <b>Table S7.</b> Wavelength and oscillator strength corresponding to the energies of the electronic transitions from the ground to the excited singlet states                                       | 17 |
| <b>Table S8.</b> Calculated frequencies of normal vibrations for D <sub>4h</sub> and C <sub>2h</sub> geometric configurations of [μ-TTDPA]Li <sub>2</sub>                                           | 19 |
| <b>Table S9.</b> Calculated frequencies of normal vibrations infrared active vibrational modes for anion [TTDPzLi] <sup>-</sup> and [μ-(TTDPA)Li] <sub>2</sub>                                      | 20 |
| <b>Table S10.</b> Calculated frequencies of normal vibrations infrared inactive vibrational modes for anion [TTDPA <sub>2</sub> Li] <sup>-</sup> and [μ-(TTDPA)Li] <sub>2</sub>                     | 21 |
| <b>Table S11.</b> Total energies (in Hartree) and frontier MO levels (in eV) for the optimized structures of TTDPA macrocycle its Li complex and their anionic forms                                | 22 |
| <b>Figure S1.</b> MO level diagram for the optimized structures of [TTDPA] <sup>2-</sup> and its mono- and dilithium complexes                                                                      | 22 |
| <b>Figure S2.</b> Cyclovoltammogramm of [TTDPA <sub>2</sub> Li] <sup>-</sup> (Li <sup>+</sup> ) in DMSO in the presence of 0.1 M tbaClO <sub>4</sub> . Scan rate 100 mV/s                           | 23 |

**Table S1.** Relative energy (h), geometric parameters (bond length  $R_e$  in Å, bond angles  $\alpha_e$ ) atomic charges (NBO, q) and Vyberg bond indices (Q) for two considered geometrical configurations of dilithium complex [TTDPaLi<sub>2</sub>].

| 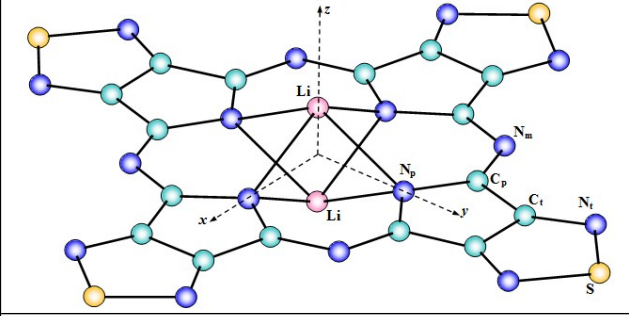 |       |                                                                     |                                             |                                      |       |  |  |  |  |  |  |
|-----------------------------------------------------------------------------------|-------|---------------------------------------------------------------------|---------------------------------------------|--------------------------------------|-------|------------------------------------------------------------------------------------|--|--|--|--|--|
| (A) [TTDPaLi <sub>2</sub> ] D <sub>4h</sub>                                       |       |                                                                     | (B) [TTDPaLi <sub>2</sub> ] C <sub>2h</sub> |                                      |       |                                                                                    |  |  |  |  |  |
| <b>(A) Symmetry D<sub>4h</sub> (h = 0.035 kJ/mol)</b>                             |       |                                                                     |                                             |                                      |       |                                                                                    |  |  |  |  |  |
| $R_e(\text{Li}-\text{N}_p)$                                                       | 2.215 | $\alpha_e(\text{N}_p\text{C}_\alpha\text{C}_\beta)$                 | 108.6                                       | q(N <sub>t</sub> )                   | -0.55 |                                                                                    |  |  |  |  |  |
| $R_e(\text{N}_p-\text{C}_\alpha)$                                                 | 1.379 | $\alpha_e(\text{C}_\alpha\text{C}_\beta\text{C}_\beta)$             | 106.6                                       | q(S)                                 | 0.87  |                                                                                    |  |  |  |  |  |
| $R_e(\text{C}_\alpha-\text{C}_\beta)$                                             | 1.457 | $\alpha_e(\text{C}_\beta\text{C}_\beta\text{N}_t)$                  | 115.2                                       | q(N <sub>m</sub> )                   | -0.43 |                                                                                    |  |  |  |  |  |
| $R_e(\text{C}_{\beta t}-\text{C}_\beta)$                                          | 1.418 | $\alpha_e(\text{C}_\beta\text{N}_t\text{S})$                        | 104.7                                       | Q(Li-N <sub>p</sub> )                | 0.04  |                                                                                    |  |  |  |  |  |
| $R_e(\text{C}_\beta-\text{N}_t)$                                                  | 1.317 | $\alpha_e(\text{N}_t\text{S}\text{N}_t)$                            | 100.2                                       | Q(N <sub>p}-\text{C}_\alpha)</sub>   | 1.24  |                                                                                    |  |  |  |  |  |
| $R_e(\text{N}_t-\text{S})$                                                        | 1.654 | $\alpha_e(\text{N}_p\text{C}_\alpha\text{N}_m)$                     | 127.9                                       | Q(C <sub>α</sub> -C <sub>β</sub> )   | 1.06  |                                                                                    |  |  |  |  |  |
| $R_e(\text{C}_\alpha-\text{N}_m)$                                                 | 1.317 | $\alpha_e(\text{C}_\alpha\text{N}_m\text{C}_\alpha)$                | 123.7                                       | Q(C <sub>β</sub> -C <sub>β</sub> )   | 1.18  |                                                                                    |  |  |  |  |  |
| $R_e(\text{Li}\cdots\text{Li})$                                                   | 2.016 | q(Li)                                                               | 0.91                                        | Q(C <sub>β</sub> -N <sub>t</sub> )   | 1.52  |                                                                                    |  |  |  |  |  |
| $R_e(\text{N}_p\cdots\text{N}_p)$                                                 | 3.944 | q(N <sub>p</sub> )                                                  | -0.71                                       | Q(N <sub>t</sub> -S)                 | 1.20  |                                                                                    |  |  |  |  |  |
| $\alpha_e(\text{LiN}_p\text{Li})$                                                 | 54.1  | q(C <sub>α</sub> )                                                  | 0.37                                        | Q(C <sub>α</sub> -N <sub>m</sub> )   | 1.39  |                                                                                    |  |  |  |  |  |
| $\alpha_e(\text{C}_\alpha\text{N}_p\text{C}_\alpha)$                              | 109.5 | q(C <sub>β</sub> )                                                  | 0.09                                        | Q(Li-Li)                             | 0.01  |                                                                                    |  |  |  |  |  |
| <b>(B) Symmetry C<sub>2h</sub> (h = 0 kJ/mol)</b>                                 |       |                                                                     |                                             |                                      |       |                                                                                    |  |  |  |  |  |
| $R_e(\text{Li}_1-\text{N}_{p1})$                                                  | 2.140 | $\alpha_e(\text{C}_{\alpha 2}\text{N}_{p2}\text{C}_{\alpha 2})$     | 109.4                                       | q(N <sub>t1</sub> )                  | -0.55 |                                                                                    |  |  |  |  |  |
| $R_e(\text{Li}_2-\text{N}_{p1})$                                                  | 2.296 | $\alpha_e(\text{N}_{p1}\text{C}_{\alpha 1}\text{C}_{\beta 1})$      | 108.6                                       | q(N <sub>t2</sub> )                  | -0.55 |                                                                                    |  |  |  |  |  |
| $R_e(\text{Li}_1-\text{N}_{p2})$                                                  | 2.213 | $\alpha_e(\text{N}_{p2}\text{C}_{\alpha 2}\text{C}_{\beta 2})$      | 108.6                                       | q(S <sub>1</sub> )                   | 0.87  |                                                                                    |  |  |  |  |  |
| $R_e(\text{N}_{p1}-\text{C}_{\alpha 1})$                                          | 1.379 | $\alpha_e(\text{C}_{\alpha 1}\text{C}_{\beta 1}\text{C}_{\beta 1})$ | 106.6                                       | q(S <sub>2</sub> )                   | 0.87  |                                                                                    |  |  |  |  |  |
| $R_e(\text{N}_{p2}-\text{C}_{\alpha 2})$                                          | 1.379 | $\alpha_e(\text{C}_{\alpha 2}\text{C}_{\beta 2}\text{C}_{\beta 2})$ | 106.6                                       | q(N <sub>m</sub> )                   | -0.43 |                                                                                    |  |  |  |  |  |
| $R_e(\text{C}_{\alpha 1}-\text{C}_{\beta 1})$                                     | 1.457 | $\alpha_e(\text{C}_{\beta 1}\text{C}_{\beta 1}\text{N}_{t1})$       | 115.2                                       | Q(Li <sub>1</sub> -N <sub>p1</sub> ) | 0.04  |                                                                                    |  |  |  |  |  |
| $R_e(\text{C}_{\alpha 2}-\text{C}_{\beta 2})$                                     | 1.457 | $\alpha_e(\text{C}_{\beta 2}\text{C}_{\beta 2}\text{N}_{t2})$       | 115.2                                       | Q(Li <sub>2</sub> -N <sub>p1</sub> ) | 0.04  |                                                                                    |  |  |  |  |  |
| $R_e(\text{C}_{\beta 1}-\text{C}_{\beta 1})$                                      | 1.418 | $\alpha_e(\text{C}_{\beta 1}\text{N}_{t1}\text{S}_1)$               | 104.7                                       | Q(Li <sub>1</sub> -N <sub>p2</sub> ) | 0.04  |                                                                                    |  |  |  |  |  |
| $R_e(\text{C}_{\beta 2}-\text{C}_{\beta 2})$                                      | 1.418 | $\alpha_e(\text{C}_{\beta 2}\text{N}_{t2}\text{S}_2)$               | 104.7                                       | Q(N <sub>p1</sub> -C <sub>α1</sub> ) | 1.24  |                                                                                    |  |  |  |  |  |
| $R_e(\text{C}_{\beta 1}-\text{N}_{t1})$                                           | 1.317 | $\alpha_e(\text{N}_{t1}\text{S}_1\text{N}_{t1})$                    | 100.2                                       | Q(N <sub>p2</sub> -C <sub>α2</sub> ) | 1.24  |                                                                                    |  |  |  |  |  |
| $R_e(\text{C}_{\beta 2}-\text{N}_{t2})$                                           | 1.317 | $\alpha_e(\text{N}_{t2}\text{S}_2\text{N}_{t2})$                    | 100.2                                       | Q(C <sub>α1</sub> -C <sub>β1</sub> ) | 1.06  |                                                                                    |  |  |  |  |  |
| $R_e(\text{N}_{t1}-\text{S}_1)$                                                   | 1.654 | $\alpha_e(\text{N}_{p1}\text{C}_{\alpha 1}\text{N}_m)$              | 127.8                                       | Q(C <sub>α2</sub> -C <sub>β2</sub> ) | 1.06  |                                                                                    |  |  |  |  |  |
| $R_e(\text{N}_{t2}-\text{S}_2)$                                                   | 1.654 | $\alpha_e(\text{N}_{p2}\text{C}_{\alpha 2}\text{N}_m)$              | 127.9                                       | Q(C <sub>β1</sub> -C <sub>β1</sub> ) | 1.18  |                                                                                    |  |  |  |  |  |
| $R_e(\text{C}_{\alpha 1}-\text{N}_m)$                                             | 1.317 | $\alpha_e(\text{C}_{\alpha 1}\text{N}_m\text{C}_{\alpha 1})$        | 123.8                                       | Q(C <sub>β2</sub> -C <sub>β2</sub> ) | 1.18  |                                                                                    |  |  |  |  |  |
| $R_e(\text{C}_{\alpha 2}-\text{N}_m)$                                             | 1.317 | q(Li)                                                               | 0.91                                        | Q(C <sub>β1</sub> -N <sub>t1</sub> ) | 1.52  |                                                                                    |  |  |  |  |  |
| $R_e(\text{Li}\cdots\text{Li})$                                                   | 2.020 | q(N <sub>p1</sub> )                                                 | -0.71                                       | Q(C <sub>β2</sub> -N <sub>t2</sub> ) | 1.52  |                                                                                    |  |  |  |  |  |
| $R_e(\text{N}_{p1}\cdots\text{N}_{p1})$                                           | 3.953 | q(N <sub>p2</sub> )                                                 | -0.71                                       | Q(N <sub>t1</sub> -S <sub>1</sub> )  | 1.20  |                                                                                    |  |  |  |  |  |
| $R_e(\text{N}_{p2}\cdots\text{N}_{p2})$                                           | 3.939 | q(C <sub>α1</sub> )                                                 | 0.37                                        | Q(N <sub>t2</sub> -S <sub>2</sub> )  | 1.20  |                                                                                    |  |  |  |  |  |
| $\alpha_e(\text{LiN}_{p1}\text{Li})$                                              | 54.0  | q(C <sub>α2</sub> )                                                 | 0.37                                        | Q(C <sub>α1</sub> -N <sub>m</sub> )  | 1.39  |                                                                                    |  |  |  |  |  |
| $\alpha_e(\text{LiN}_{p2}\text{Li})$                                              | 54.3  | q(C <sub>β1</sub> )                                                 | 0.09                                        | Q(C <sub>α2</sub> -N <sub>m</sub> )  | 1.39  |                                                                                    |  |  |  |  |  |
| $\alpha_e(\text{C}_{\alpha 1}\text{N}_{p1}\text{C}_{\alpha 1})$                   | 109.5 | q(C <sub>β2</sub> )                                                 | 0.09                                        | Q(Li-Li)                             | 0.01  |                                                                                    |  |  |  |  |  |

**Table S2.** Relative energy (h), geometric parameters (bond length  $R_e$  in Å, bond angles  $\alpha_e$ ) for four considered geometrical configurations of monolithium complex [TTDPaHLi]. Atomic charges (NBO, q) and Vyberg bond indices (Q) are given for the most stable  $C_s$  structure.

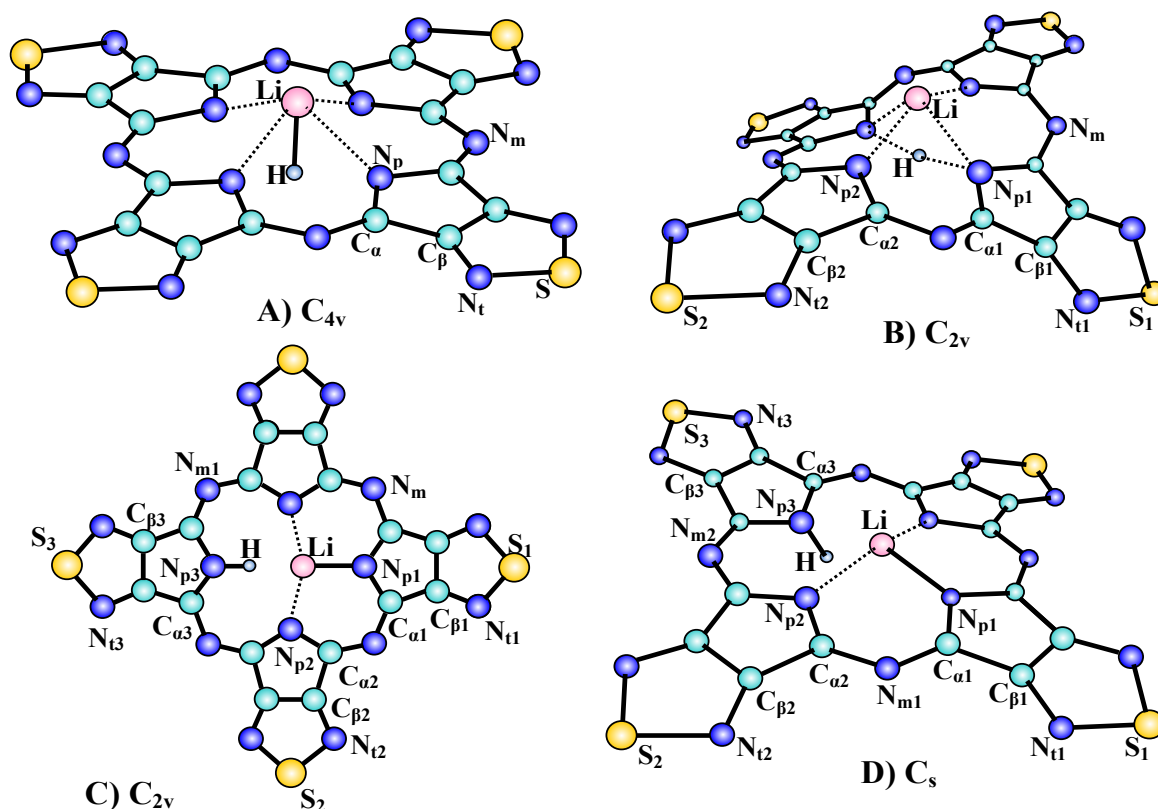

| <b>(A) Symmetry <math>C_{4v}</math> (h = 360 kJ/mol)</b> |       |                                                                  |       |                                                                             |       |
|----------------------------------------------------------|-------|------------------------------------------------------------------|-------|-----------------------------------------------------------------------------|-------|
| $R_e(\text{Li}-\text{N}_p)$                              | 2.191 | $R_e(\text{C}_\alpha-\text{N}_m)$                                | 1.311 | $\alpha_e(\text{C}_\beta\text{C}_\beta\text{N}_t)$                          | 115.3 |
| $R_e(\text{N}_p-\text{C}_\alpha)$                        | 1.382 | $R_e(\text{Li}-\text{H})$                                        | 1.648 | $\alpha_e(\text{C}_\beta\text{N}_t\text{S})$                                | 104.6 |
| $R_e(\text{C}_\alpha-\text{C}_\beta)$                    | 1.455 | $\alpha_e(\text{N}_p\text{LiN}_p)$                               | 126.0 | $\alpha_e(\text{N}_t\text{S}\text{N}_t)$                                    | 100.3 |
| $R_e(\text{C}_\beta-\text{C}_\beta)$                     | 1.413 | $\alpha_e(\text{C}_\alpha\text{N}_p\text{C}_\alpha)$             | 108.6 | $\alpha_e(\text{N}_p\text{C}_\alpha\text{N}_m)$                             | 128.0 |
| $R_e(\text{C}_\beta-\text{N}_t)$                         | 1.318 | $\alpha_e(\text{N}_p\text{C}_\alpha\text{C}_\beta)$              | 109.0 | $\alpha_e(\text{C}_\alpha\text{N}_m\text{C}_\alpha)$                        | 123.0 |
| $R_e(\text{N}_t-\text{S})$                               | 1.654 | $\alpha_e(\text{C}_\alpha\text{C}_\beta\text{C}_\beta)$          | 106.6 | $\chi_e(\text{LiN}_p\text{N}_p\text{N}_m)$                                  | 147.8 |
| <b>(B) Symmetry <math>C_{2v}</math> (h = 330 kJ/mol)</b> |       |                                                                  |       |                                                                             |       |
| $R_e(\text{Li}-\text{N}_{p1})$                           | 2.089 | $R_e(\text{C}_{\alpha1}-\text{N}_m)$                             | 1.315 | $\alpha_e(\text{C}_{\beta2}\text{N}_{t2}\text{S}_2)$                        | 105.0 |
| $R_e(\text{Li}-\text{N}_{p2})$                           | 2.203 | $R_e(\text{C}_{\alpha2}-\text{N}_m)$                             | 1.316 | $\alpha_e(\text{N}_{t1}\text{S}_1\text{N}_{t1})$                            | 100.6 |
| $R_e(\text{Li}-\text{H})$                                | 1.657 | $\alpha_e(\text{N}_{p1}\text{LiN}_{p1})$                         | 94.8  | $\alpha_e(\text{N}_{t2}\text{S}_2\text{N}_{t2})$                            | 99.9  |
| $R_e(\text{N}_{p1}-\text{C}_{\alpha1})$                  | 1.428 | $\alpha_e(\text{N}_{p2}\text{LiN}_{p2})$                         | 144.8 | $\alpha_e(\text{N}_{p1}\text{C}_{\alpha1}\text{N}_m)$                       | 132.2 |
| $R_e(\text{N}_{p2}-\text{C}_{\alpha2})$                  | 1.350 | $\alpha_e(\text{C}_{\alpha1}\text{N}_{p1}\text{C}_{\alpha1})$    | 106.2 | $\alpha_e(\text{N}_{p2}\text{C}_{\alpha2}\text{N}_m)$                       | 121.9 |
| $R_e(\text{C}_{\alpha1}-\text{C}_{\beta1})$              | 1.445 | $\alpha_e(\text{C}_{\alpha2}\text{N}_{p2}\text{C}_{\alpha2})$    | 109.6 | $\alpha_e(\text{C}_{\alpha1}\text{N}_m\text{C}_{\alpha2})$                  | 121.8 |
| $R_e(\text{C}_{\alpha2}-\text{C}_{\beta2})$              | 1.463 | $\alpha_e(\text{N}_{p1}\text{C}_{\alpha1}\text{C}_{\beta1})$     | 108.5 | $\chi_e(\text{C}_{\alpha1}\cdots\text{C}_{\alpha1})$                        | 169.3 |
| $R_e(\text{C}_{\beta1}-\text{C}_{\beta1})$               | 1.404 | $\alpha_e(\text{N}_{p2}\text{C}_{\alpha2}\text{C}_{\beta2})$     | 108.9 | $\chi_e(\text{C}_{\alpha2}\cdots\text{C}_{\alpha2})$                        | 166.7 |
| $R_e(\text{C}_{\beta2}-\text{C}_{\beta2})$               | 1.429 | $\alpha_e(\text{C}_{\alpha1}\text{C}_{\beta1}\text{C}_{\beta1})$ | 107.7 | $\chi_e(\text{C}_{\alpha1}\text{C}_{\beta1}\text{C}_{\beta1}\text{N}_{t1})$ | 177.0 |
| $R_e(\text{C}_{\beta1}-\text{N}_{t1})$                   | 1.322 | $\alpha_e(\text{C}_{\alpha2}\text{C}_{\beta2}\text{C}_{\beta2})$ | 105.4 | $\chi_e(\text{C}_{\alpha2}\text{C}_{\beta2}\text{C}_{\beta2}\text{N}_{t2})$ | 177.0 |
| $R_e(\text{C}_{\beta2}-\text{N}_{t2})$                   | 1.312 | $\alpha_e(\text{C}_{\beta1}\text{C}_{\beta1}\text{N}_{t1})$      | 115.3 | $\chi_e(\text{C}_{\beta1}\text{C}_{\alpha1}\text{N}_m\text{C}_{\alpha2})$   | 178.9 |
| $R_e(\text{N}_{t1}-\text{S}_1)$                          | 1.648 | $\alpha_e(\text{C}_{\beta2}\text{C}_{\beta2}\text{N}_{t2})$      | 115.0 | $\chi_e(\text{C}_{\beta2}\text{C}_{\alpha2}\text{N}_m\text{C}_{\alpha1})$   | 165.0 |
| $R_e(\text{N}_{t2}-\text{S}_2)$                          | 1.659 | $\alpha_e(\text{C}_{\beta1}\text{N}_{t1}\text{S}_1)$             | 104.4 |                                                                             |       |
| <b>(C) Symmetry <math>C_{2v}</math> (h = 32 kJ/mol)</b>  |       |                                                                  |       |                                                                             |       |
| $R_e(\text{Li}-\text{N}_{p1})$                           | 1.757 | $R_e(\text{N}_{t2}-\text{S}_2)$                                  | 1.656 | $\alpha_e(\text{C}_{\beta1}\text{C}_{\beta1}\text{N}_{t1})$                 | 114.9 |
| $R_e(\text{Li}-\text{N}_{p2})$                           | 1.963 | $R_e(\text{N}_{t3}-\text{S}_3)$                                  | 1.647 | $\alpha_e(\text{C}_{\beta2}\text{C}_{\beta2}\text{N}_{t2})$                 | 115.3 |

|                                                                  |             |                                                                     |             |                                                                                 |             |
|------------------------------------------------------------------|-------------|---------------------------------------------------------------------|-------------|---------------------------------------------------------------------------------|-------------|
| $R_e(\text{Li-H})$                                               | 1.636       | $R_e(\text{C}_{\alpha 1}-\text{N}_m)$                               | 1.320       | $\alpha_e(\text{C}_{\beta 3}\text{C}_{\beta 3}\text{N}_{t3})$                   | 114.5       |
| $R_e(\text{N}_{p1}-\text{C}_{\alpha 1})$                         | 1.350       | $R_e(\text{C}_{\alpha 2}-\text{N}_m)$                               | 1.328       | $\alpha_e(\text{C}_{\beta 1}\text{N}_{t1}\text{S}_1)$                           | 105.2       |
| $R_e(\text{N}_{p2}-\text{C}_{\alpha 2})$                         | 1.386       | $R_e(\text{C}_{\alpha 2}-\text{N}_{m1})$                            | 1.327       | $\alpha_e(\text{C}_{\beta 2}\text{N}_{t2}\text{S}_2)$                           | 104.8       |
| $R_e(\text{N}_{p3}-\text{C}_{\alpha 3})$                         | 1.375       | $R_e(\text{C}_{\alpha 3}-\text{N}_{m1})$                            | 1.309       | $\alpha_e(\text{C}_{\beta 3}\text{N}_{t3}\text{S}_3)$                           | 105.2       |
| $R_e(\text{C}_{\alpha 1}-\text{C}_{\beta 1})$                    | 1.471       | $R_e(\text{N}_{p3}-\text{H})$                                       | 0.984       | $\alpha_e(\text{N}_{t1}\text{S}_1\text{N}_{t1})$                                | 99.8        |
| $R_e(\text{C}_{\alpha 2}-\text{C}_{\beta 2})$                    | 1.463       | $\alpha_e(\text{C}_{\alpha 1}\text{N}_{p1}\text{C}_{\alpha 1})$     | 113.9       | $\alpha_e(\text{N}_{t2}\text{S}_2\text{N}_{t2})$                                | 100.0       |
| $R_e(\text{C}_{\alpha 3}-\text{C}_{\beta 3})$                    | 1.453       | $\alpha_e(\text{C}_{\alpha 2}\text{N}_{p2}\text{C}_{\alpha 2})$     | 110.1       | $\alpha_e(\text{N}_{t3}\text{S}_3\text{N}_{t3})$                                | 100.5       |
| $R_e(\text{C}_{\beta 1}-\text{C}_{\beta 1})$                     | 1.433       | $\alpha_e(\text{C}_{\alpha 3}\text{N}_{p3}\text{C}_{\alpha 3})$     | 117.9       | $\alpha_e(\text{N}_{p1}\text{C}_{\alpha 1}\text{N}_m)$                          | 125.4       |
| $R_e(\text{C}_{\beta 2}-\text{C}_{\beta 2})$                     | 1.417       | $\alpha_e(\text{N}_{p1}\text{C}_{\alpha 1}\text{C}_{\beta 1})$      | 106.7       | $\alpha_e(\text{N}_{p2}\text{C}_{\alpha 2}\text{N}_m)$                          | 131.0       |
| $R_e(\text{C}_{\beta 3}-\text{C}_{\beta 3})$                     | 1.440       | $\alpha_e(\text{N}_{p2}\text{C}_{\alpha 2}\text{C}_{\beta 2})$      | 107.7       | $\alpha_e(\text{N}_{p2}\text{C}_{\alpha 2}\text{N}_{m1})$                       | 129.8       |
| $R_e(\text{C}_{\beta 1}-\text{N}_{t1})$                          | 1.311       | $\alpha_e(\text{N}_{p3}\text{C}_{\alpha 3}\text{C}_{\beta 3})$      | 102.7       | $\alpha_e(\text{N}_{p3}\text{C}_{\alpha 3}\text{N}_{m1})$                       | 126.5       |
| $R_e(\text{C}_{\beta 2}-\text{N}_{t2})$                          | 1.315       | $\alpha_e(\text{C}_{\alpha 1}\text{C}_{\beta 1}\text{C}_{\beta 1})$ | 106.3       | $\alpha_e(\text{C}_{\alpha 1}\text{N}_m\text{C}_{\alpha 2})$                    | 126.3       |
| $R_e(\text{C}_{\beta 3}-\text{N}_{t3})$                          | 1.318       | $\alpha_e(\text{C}_{\alpha 2}\text{C}_{\beta 2}\text{C}_{\beta 2})$ | 107.1       | $\alpha_e(\text{C}_{\alpha 2}\text{N}_{m1}\text{C}_{\alpha 3})$                 | 127.0       |
| $R_e(\text{N}_{t1}-\text{S}_1)$                                  | 1.659       | $\alpha_e(\text{C}_{\alpha 3}\text{C}_{\beta 3}\text{C}_{\beta 3})$ | 108.4       |                                                                                 |             |
| <b>(D) Symmetry <math>C_s</math> (<math>h = 0</math> kJ/mol)</b> |             |                                                                     |             |                                                                                 |             |
| $R_e(\text{Li-N}_{p1})$                                          | 1.874       | $R_e(\text{C}_{\alpha 2}-\text{N}_{m1})$                            | 1.323       | $\alpha_e(\text{C}_{\beta 1}\text{N}_{t1}\text{S}_1)$                           | 104.9       |
| $R_e(\text{Li-N}_{p2})$                                          | 2.035       | $R_e(\text{C}_{\alpha 2}-\text{N}_{m2})$                            | 1.324       | $\alpha_e(\text{C}_{\beta 2}\text{N}_{t2}\text{S}_2)$                           | 104.8/104.7 |
| $R_e(\text{Li-H})$                                               | 1.976       | $R_e(\text{C}_{\alpha 3}-\text{N}_{m2})$                            | 1.306       | $\alpha_e(\text{C}_{\beta 3}\text{N}_{t3}\text{S}_3)$                           | 105.0       |
| $R_e(\text{N}_{p1}-\text{C}_{\alpha 1})$                         | 1.359       | $R_e(\text{N}_{p3}-\text{H})$                                       | 1.009       | $\alpha_e(\text{N}_{t1}\text{S}_1\text{N}_{t1})$                                | 99.8        |
| $R_e(\text{N}_{p2}-\text{C}_{\alpha 2})$                         | 1.376/1.375 | $\alpha_e(\text{LiN}_{p1}\text{C}_{\alpha 1})$                      | 124.2       | $\alpha_e(\text{N}_{t2}\text{S}_2\text{N}_{t2})$                                | 100.0       |
| $R_e(\text{N}_{p3}-\text{C}_{\alpha 3})$                         | 1.397       | $\alpha_e(\text{N}_{p2}\text{LiN}_{p2})$                            | 149.2       | $\alpha_e(\text{N}_{t3}\text{S}_3\text{N}_{t3})$                                | 100.8       |
| $R_e(\text{C}_{\alpha 1}-\text{C}_{\beta 1})$                    | 1.468       | $\alpha_e(\text{N}_{p3}\text{HLi})$                                 | 103.8       | $\alpha_e(\text{N}_{p1}\text{C}_{\alpha 1}\text{N}_{m1})$                       | 126.9       |
| $R_e(\text{C}_{\alpha 2}-\text{C}_{\beta 2})$                    | 1.463/1.459 | $\alpha_e(\text{C}_{\alpha 1}\text{N}_{p1}\text{C}_{\alpha 1})$     | 111.6       | $\alpha_e(\text{N}_{p2}\text{C}_{\alpha 2}\text{N}_{m1})$                       | 129.8       |
| $R_e(\text{C}_{\alpha 3}-\text{C}_{\beta 3})$                    | 1.443       | $\alpha_e(\text{C}_{\alpha 2}\text{N}_{p2}\text{C}_{\alpha 2})$     | 109.8       | $\alpha_e(\text{N}_{p2}\text{C}_{\alpha 2}\text{N}_{m2})$                       | 127.9       |
| $R_e(\text{C}_{\beta 1}-\text{C}_{\beta 1})$                     | 1.424       | $\alpha_e(\text{C}_{\alpha 3}\text{N}_{p3}\text{C}_{\alpha 3})$     | 114.5       | $\alpha_e(\text{N}_{p3}\text{C}_{\alpha 3}\text{N}_{m2})$                       | 127.7       |
| $R_e(\text{C}_{\beta 2}-\text{C}_{\beta 2})$                     | 1.417       | $\alpha_e(\text{N}_{p1}\text{C}_{\alpha 1}\text{C}_{\beta 1})$      | 107.9       | $\alpha_e(\text{C}_{\alpha 1}\text{N}_{m1}\text{C}_{\alpha 2})$                 | 125.2       |
| $R_e(\text{C}_{\beta 3}-\text{C}_{\beta 3})$                     | 1.431       | $\alpha_e(\text{N}_{p2}\text{C}_{\alpha 2}\text{C}_{\beta 2})$      | 108.2/108.8 | $\alpha_e(\text{C}_{\alpha 2}\text{N}_{m2}\text{C}_{\alpha 3})$                 | 125.4       |
| $R_e(\text{C}_{\beta 1}-\text{N}_{t1})$                          | 1.312       | $\alpha_e(\text{N}_{p3}\text{C}_{\alpha 3}\text{C}_{\beta 3})$      | 104.1       | $\alpha_e(\text{HN}_{p3}\text{C}_{\alpha 3})$                                   | 120.3       |
| $R_e(\text{C}_{\beta 2}-\text{N}_{t2})$                          | 1.314/1.315 | $\alpha_e(\text{C}_{\alpha 1}\text{C}_{\beta 1}\text{C}_{\beta 1})$ | 106.3       | $\chi_e(\text{C}_{\alpha 1}\cdots\text{C}_{\alpha 1})$                          | 176.7       |
| $R_e(\text{C}_{\beta 3}-\text{N}_{t3})$                          | 1.322       | $\alpha_e(\text{C}_{\alpha 2}\text{C}_{\beta 2}\text{C}_{\beta 2})$ | 106.8/106.3 | $\chi_e(\text{C}_{\beta 1}\text{C}_{\alpha 1}\text{N}_{m1}\text{C}_{\alpha 2})$ | 173.4       |
| $R_e(\text{N}_{t1}-\text{S}_1)$                                  | 1.659       | $\alpha_e(\text{C}_{\alpha 3}\text{C}_{\beta 3}\text{C}_{\beta 3})$ | 108.6       | $\chi_e(\text{C}_{\beta 2}\text{C}_{\alpha 2}\text{N}_{m1}\text{C}_{\alpha 1})$ | 176.7       |
| $R_e(\text{N}_{t2}-\text{S}_2)$                                  | 1.656/1.657 | $\alpha_e(\text{C}_{\beta 1}\text{C}_{\beta 1}\text{N}_{t1})$       | 115.1       | $\chi_e(\text{C}_{\beta 2}\text{C}_{\alpha 2}\text{N}_{m2}\text{C}_{\alpha 3})$ | 177.3       |
| $R_e(\text{N}_{t3}-\text{S}_3)$                                  | 1.643       | $\alpha_e(\text{C}_{\beta 2}\text{C}_{\beta 2}\text{N}_{t2})$       | 115.2/115.3 | $\chi_e(\text{C}_{\beta 3}\text{C}_{\alpha 3}\text{N}_{m2}\text{C}_{\alpha 2})$ | 165.6       |
| $R_e(\text{C}_{\alpha 1}-\text{N}_{m1})$                         | 1.318       | $\alpha_e(\text{C}_{\beta 3}\text{C}_{\beta 3}\text{N}_{t3})$       | 114.6       |                                                                                 |             |
| $q(\text{Li})$                                                   | 0.87        | $q(\text{N}_{t3})$                                                  | -0.55       | $Q(\text{C}_{\beta 1}-\text{C}_{\beta 1})$                                      | 1.17        |
| $q(\text{H})$                                                    | 0.42        | $q(\text{S}_1)$                                                     | 0.85        | $Q(\text{C}_{\beta 2}-\text{C}_{\beta 2})$                                      | 1.18        |
| $q(\text{N}_{p1})$                                               | -0.63       | $q(\text{S}_2)$                                                     | 0.86        | $Q(\text{C}_{\beta 3}-\text{C}_{\beta 3})$                                      | 1.16        |
| $q(\text{N}_{p2})$                                               | -0.64       | $q(\text{S}_3)$                                                     | 0.92        | $Q(\text{C}_{\beta 1}-\text{N}_{t1})$                                           | 1.55        |
| $q(\text{N}_{p3})$                                               | -0.60       | $Q(\text{Li-N}_{p1})$                                               | 0.06        | $Q(\text{C}_{\beta 2}-\text{N}_{t2})$                                           | 1.53/1.53   |
| $q(\text{C}_{\alpha 1})$                                         | 0.39        | $Q(\text{Li-N}_{p2})$                                               | 0.07        | $Q(\text{C}_{\beta 3}-\text{N}_{t3})$                                           | 1.48        |
| $q(\text{C}_{\alpha 2})$                                         | 0.39/0.37   | $Q(\text{Li-H})$                                                    | 0.004       | $Q(\text{N}_{t1}-\text{S}_1)$                                                   | 1.19        |
| $q(\text{C}_{\alpha 3})$                                         | 0.37        | $Q(\text{N}_{p1}-\text{C}_{\alpha 1})$                              | 1.27        | $Q(\text{N}_{t2}-\text{S}_2)$                                                   | 1.20/1.19   |
| $q(\text{C}_{\beta 1})$                                          | 0.09        | $Q(\text{N}_{p2}-\text{C}_{\alpha 2})$                              | 1.27/1.26   | $Q(\text{N}_{t3}-\text{S}_3)$                                                   | 1.23        |
| $q(\text{C}_{\beta 2})$                                          | 0.09/0.08   | $Q(\text{N}_{p3}-\text{C}_{\alpha 3})$                              | 1.10        | $Q(\text{C}_{\alpha 1}-\text{N}_{m1})$                                          | 1.39        |
| $q(\text{C}_{\beta 3})$                                          | 0.09        | $Q(\text{C}_{\alpha 1}-\text{C}_{\beta 1})$                         | 1.04        | $Q(\text{C}_{\alpha 2}-\text{N}_{m1})$                                          | 1.38        |
| $q(\text{N}_{t1})$                                               | -0.54       | $Q(\text{C}_{\alpha 2}-\text{C}_{\beta 2})$                         | 1.04/1.05   | $Q(\text{C}_{\alpha 2}-\text{N}_{m2})$                                          | 1.37        |
| $q(\text{N}_{t2})$                                               | -0.54/-0.55 | $Q(\text{C}_{\alpha 3}-\text{C}_{\beta 3})$                         | 1.10        | $Q(\text{C}_{\alpha 3}-\text{N}_{m2})$                                          | 1.44        |
| $q(\text{N}_{t3})$                                               | -0.55       |                                                                     |             | $Q(\text{N}_{p3}-\text{H})$                                                     | 0.78        |

**Table S3.** Geometric parameters (bond length  $R_e$  in Å, bond angles  $\alpha_e$ ) atomic charges (NBO,  $q$ ) and Vyberg bond indices ( $Q$ ) for lithate complex [TTDPaLi]<sup>-</sup> and its *meso*-protonated form H[TTDPaLi]

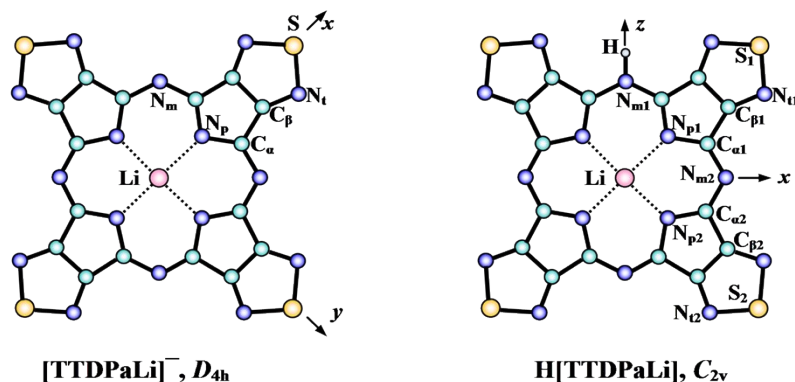

|                                                      |       | [TTDPaLi] <sup>-</sup>                                  | D <sub>4h</sub> |                                     |       |
|------------------------------------------------------|-------|---------------------------------------------------------|-----------------|-------------------------------------|-------|
| $R_e(\text{Li-N}_p)$                                 | 2.011 | $\alpha_e(\text{C}_\alpha\text{C}_\beta\text{C}_\beta)$ | 106.3           | $q(\text{N}_t)$                     | -0.56 |
| $R_e(\text{N}_p\text{-C}_\alpha)$                    | 1.363 | $\alpha_e(\text{C}_\beta\text{C}_\beta\text{N}_t)$      | 115.2           | $q(\text{S})$                       | 0.78  |
| $R_e(\text{C}_\alpha\text{-C}_\beta)$                | 1.466 | $\alpha_e(\text{C}_\beta\text{N}_t\text{S})$            | 104.9           | $q(\text{N}_m)$                     | -0.45 |
| $R_e(\text{C}_\beta\text{-C}_\beta)$                 | 1.428 | $\alpha_e(\text{N}_t\text{S}\text{N}_t)$                | 99.8            | $Q(\text{Li-N}_p)$                  | 0.06  |
| $R_e(\text{C}_\beta\text{-N}_t)$                     | 1.313 | $\alpha_e(\text{N}_p\text{C}_\alpha\text{N}_m)$         | 128.4           | $Q(\text{N}_p\text{-C}_\alpha)$     | 1.28  |
| $R_e(\text{N}_t\text{-S})$                           | 1.664 | $\alpha_e(\text{C}_\alpha\text{N}_m\text{C}_\alpha)$    | 124.5           | $Q(\text{C}_\alpha\text{-C}_\beta)$ | 1.04  |
| $R_e(\text{C}_\alpha\text{-N}_m)$                    | 1.323 | $q(\text{Li})$                                          | 0.85            | $Q(\text{C}_\beta\text{-C}_\beta)$  | 1.16  |
| $R_e(\text{N}_p\cdots\text{N}_p)$                    | 4.022 | $q(\text{N}_p)$                                         | -0.57           | $Q(\text{C}_\beta\text{-N}_t)$      | 1.55  |
| $\alpha_e(\text{C}_\alpha\text{N}_p\text{C}_\alpha)$ | 111.3 | $q(\text{C}_\alpha)$                                    | 0.35            | $Q(\text{N}_t\text{-S})$            | 1.16  |
| $\alpha_e(\text{N}_p\text{C}_\alpha\text{C}_\beta)$  | 108.1 | $q(\text{C}_\beta)$                                     | 0.10            | $Q(\text{C}_\alpha\text{-N}_m)$     | 1.38  |

| <b><i>meso</i>-Protonated form H[TTDPaLi] (symmetry C<sub>2v</sub>)</b>          |             |                                                                  |             |                                                               |             |
|----------------------------------------------------------------------------------|-------------|------------------------------------------------------------------|-------------|---------------------------------------------------------------|-------------|
| <b>(<math>h = -67.4</math> kJ/mol as compared to [TTDPaHLi] (C<sub>s</sub>))</b> |             |                                                                  |             |                                                               |             |
| $R_e(\text{Li-N}_{p1})$                                                          | 2.032       | $R_e(\text{N}_{t2}\text{-S}_2)$                                  | 1.660/1.660 | $\alpha_e(\text{C}_{\beta1}\text{C}_{\beta1}\text{N}_{t1})$   | 114.1/116.0 |
| $R_e(\text{Li-N}_{p2})$                                                          | 1.994       | $R_e(\text{C}_{\alpha1}\text{-N}_{m1})$                          | 1.354       | $\alpha_e(\text{C}_{\beta2}\text{C}_{\beta2}\text{N}_{t2})$   | 115.2/115.3 |
| $R_e(\text{N}_{m1}\text{-H})$                                                    | 1.013       | $R_e(\text{C}_{\alpha1}\text{-N}_{m2})$                          | 1.315       | $\alpha_e(\text{C}_{\beta1}\text{N}_{t1}\text{S}_1)$          | 105.6/104.4 |
| $R_e(\text{N}_{p1}\text{-C}_{\alpha1})$                                          | 1.377/1.336 | $R_e(\text{C}_{\alpha2}\text{-N}_{m2})$                          | 1.323       | $\alpha_e(\text{C}_{\beta2}\text{N}_{t2}\text{S}_2)$          | 104.9/104.8 |
| $R_e(\text{N}_{p2}\text{-C}_{\alpha2})$                                          | 1.363/1.363 | $R_e(\text{N}_{p1}\cdots\text{N}_{p2})$                          | 4.026       | $\alpha_e(\text{N}_{t1}\text{S}_1\text{N}_{t1})$              | 99.8        |
| $R_e(\text{C}_{\alpha1}\text{-C}_{\beta1})$                                      | 1.466/1.447 | $\alpha_e(\text{N}_{p1}\text{LiN}_{p2})$                         | 89.6        | $\alpha_e(\text{N}_{t2}\text{S}_2\text{N}_{t2})$              | 99.8        |
| $R_e(\text{C}_{\alpha2}\text{-C}_{\beta2})$                                      | 1.469/1.467 | $\alpha_e(\text{C}_{\alpha1}\text{N}_{p1}\text{C}_{\alpha1})$    | 109.8       | $\alpha_e(\text{N}_{p1}\text{C}_{\alpha1}\text{N}_{m1})$      | 124.5       |
| $R_e(\text{C}_{\beta1}\text{-C}_{\beta1})$                                       | 1.424       | $\alpha_e(\text{C}_{\alpha2}\text{N}_{p2}\text{C}_{\alpha2})$    | 110.7       | $\alpha_e(\text{N}_{p1}\text{C}_{\alpha1}\text{N}_{m2})$      | 127.9       |
| $R_e(\text{C}_{\beta2}\text{-C}_{\beta2})$                                       | 1.421       | $\alpha_e(\text{N}_{p1}\text{C}_{\alpha1}\text{C}_{\beta1})$     | 107.7/110.7 | $\alpha_e(\text{N}_{p2}\text{C}_{\alpha2}\text{N}_{m2})$      | 127.9       |
| $R_e(\text{C}_{\beta1}\text{-N}_{t1})$                                           | 1.314/1.314 | $\alpha_e(\text{N}_{p2}\text{C}_{\alpha2}\text{C}_{\beta2})$     | 108.3/108.5 | $\alpha_e(\text{C}_{\alpha1}\text{N}_{m1}\text{C}_{\alpha1})$ | 129.1       |
| $R_e(\text{C}_{\beta2}\text{-N}_{t2})$                                           | 1.312/1.312 | $\alpha_e(\text{C}_{\alpha1}\text{C}_{\beta1}\text{C}_{\beta1})$ | 106.5/105.2 | $\alpha_e(\text{C}_{\alpha1}\text{N}_{m2}\text{C}_{\alpha2})$ | 125.0       |
| $R_e(\text{N}_{t1}\text{-S}_1)$                                                  | 1.655/1.662 | $\alpha_e(\text{C}_{\alpha2}\text{C}_{\beta2}\text{C}_{\beta2})$ | 106.3/106.2 |                                                               |             |
| $q(\text{Li})$                                                                   | 0.86        | $q(\text{S}_1)$                                                  | 0.86        | $Q(\text{C}_{\alpha2}\text{-C}_{\beta2})$                     | 1.29/1.29   |
| $q(\text{H})$                                                                    | 0.43        | $q(\text{S}_2)$                                                  | 0.84        | $Q(\text{C}_{\beta1}\text{-C}_{\beta1})$                      | 1.16        |
| $q(\text{N}_{p1})$                                                               | -0.55       | $q(\text{N}_{m1})$                                               | -0.45       | $Q(\text{C}_{\beta2}\text{-C}_{\beta2})$                      | 1.17        |
| $q(\text{N}_{p2})$                                                               | -0.58       | $q(\text{N}_{m2})$                                               | -0.42       | $Q(\text{C}_{\beta1}\text{-N}_{t1})$                          | 1.54/1.52   |
| $q(\text{C}_{\alpha1})$                                                          | 0.37/0.36   | $Q(\text{Li-N}_{p1})$                                            | 0.06        | $Q(\text{C}_{\beta2}\text{-N}_{t2})$                          | 1.55/1.55   |
| $q(\text{C}_{\alpha2})$                                                          | 0.39/0.38   | $Q(\text{Li-N}_{p2})$                                            | 0.06        | $Q(\text{N}_{t1}\text{-S}_1)$                                 | 1.20/1.17   |
| $q(\text{C}_{\beta1})$                                                           | 0.10/0.07   | $Q(\text{N}_{m1}\text{-H})$                                      | 0.78        | $Q(\text{N}_{t2}\text{-S}_2)$                                 | 1.18/1.18   |
| $q(\text{C}_{\beta2})$                                                           | 0.09/0.09   | $Q(\text{N}_{p1}\text{-C}_{\alpha1})$                            | 1.23/1.37   | $Q(\text{C}_{\alpha1}\text{-N}_{m1})$                         | 1.19        |
| $q(\text{N}_{t1})$                                                               | -0.54/-0.58 | $Q(\text{N}_{p2}\text{-C}_{\alpha2})$                            | 1.29/1.29   | $Q(\text{C}_{\alpha1}\text{-N}_{m2})$                         | 1.41        |
| $q(\text{N}_{t2})$                                                               | -0.54/-0.54 | $Q(\text{C}_{\alpha1}\text{-C}_{\beta1})$                        | 1.05/1.07   | $Q(\text{C}_{\alpha2}\text{-N}_{m2})$                         | 1.37        |

**Table S4.** Geometric parameters (bond length  $R_e$  in Å, bond angles  $\alpha_e$ ) atomic charges (NBO,  $q$ ) and Vyberg bond indices ( $Q$ ) for [TTDPaH<sub>2</sub>] and corresponding dianion [TTDPa]<sup>2-</sup>

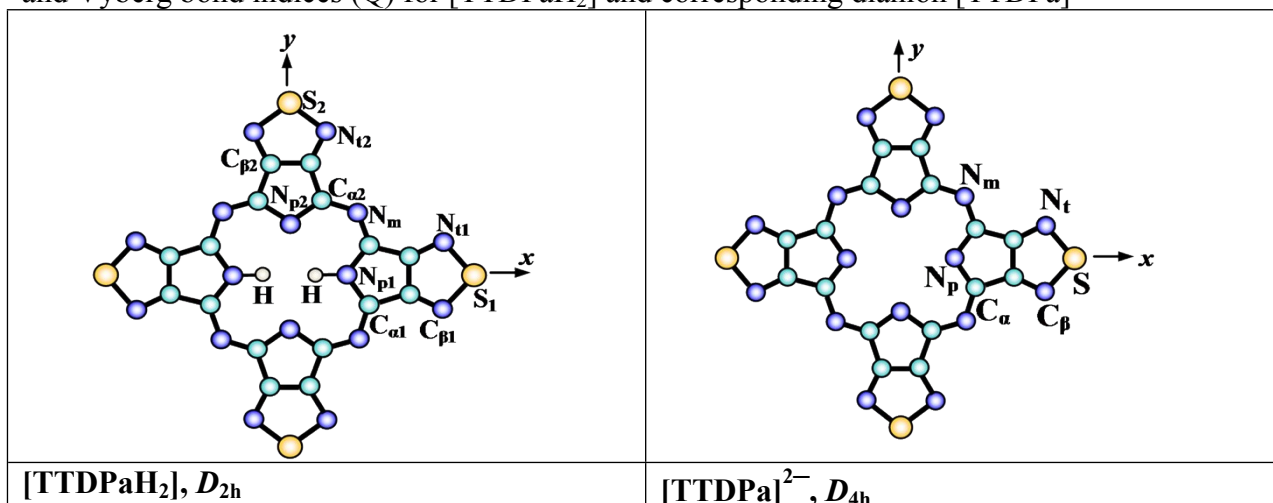

|                                                               |       | [TTDPaH <sub>2</sub> ]                                           | $D_{2h}$ |                                           |       |
|---------------------------------------------------------------|-------|------------------------------------------------------------------|----------|-------------------------------------------|-------|
| $R_e(\text{H}-\text{N}_{p1})$                                 | 1.011 | $\alpha_e(\text{C}_{\alpha1}\text{C}_{\beta1}\text{C}_{\beta1})$ | 108.1    | $q(\text{N}_{t1})$                        | -0.54 |
| $R_e(\text{N}_{p1}-\text{C}_{\alpha1})$                       | 1.382 | $\alpha_e(\text{C}_{\alpha2}\text{C}_{\beta2}\text{C}_{\beta2})$ | 106.1    | $q(\text{N}_{t2})$                        | -0.54 |
| $R_e(\text{N}_{p2}-\text{C}_{\alpha2})$                       | 1.365 | $\alpha_e(\text{C}_{\beta1}\text{C}_{\beta1}\text{N}_{t1})$      | 114.9    | $q(\text{S}_1)$                           | 0.90  |
| $R_e(\text{C}_{\alpha1}-\text{C}_{\beta1})$                   | 1.452 | $\alpha_e(\text{C}_{\beta2}\text{C}_{\beta2}\text{N}_{t2})$      | 115.3    | $q(\text{S}_2)$                           | 0.85  |
| $R_e(\text{C}_{\alpha2}-\text{C}_{\beta2})$                   | 1.464 | $\alpha_e(\text{C}_{\beta1}\text{N}_{t1}\text{S}_1)$             | 104.9    | $q(\text{N}_m)$                           | -0.42 |
| $R_e(\text{C}_{\beta1}-\text{C}_{\beta1})$                    | 1.425 | $\alpha_e(\text{C}_{\beta2}\text{N}_{t2}\text{S}_2)$             | 104.8    | $Q(\text{H}-\text{N}_{p1})$               | 0.73  |
| $R_e(\text{C}_{\beta2}-\text{C}_{\beta2})$                    | 1.417 | $\alpha_e(\text{N}_{t1}\text{S}_1\text{N}_{t1})$                 | 100.4    | $Q(\text{N}_{p1}-\text{C}_{\alpha1})$     | 1.15  |
| $R_e(\text{C}_{\beta1}-\text{N}_{t1})$                        | 1.318 | $\alpha_e(\text{N}_{t2}\text{S}_2\text{N}_{t2})$                 | 99.8     | $Q(\text{N}_{p2}-\text{C}_{\alpha2})$     | 1.30  |
| $R_e(\text{C}_{\beta2}-\text{N}_{t2})$                        | 1.313 | $\alpha_e(\text{N}_{p1}\text{C}_{\alpha1}\text{N}_m)$            | 128.7    | $Q(\text{C}_{\alpha1}-\text{C}_{\beta1})$ | 1.08  |
| $R_e(\text{N}_{t1}-\text{S}_1)$                               | 1.649 | $\alpha_e(\text{N}_{p2}\text{C}_{\alpha2}\text{N}_m)$            | 128.1    | $Q(\text{C}_{\alpha2}-\text{C}_{\beta2})$ | 1.04  |
| $R_e(\text{N}_{t2}-\text{S}_2)$                               | 1.659 | $\alpha_e(\text{C}_{\alpha1}\text{N}_m\text{C}_{\alpha2})$       | 125.3    | $Q(\text{C}_{\beta1}-\text{C}_{\beta1})$  | 1.17  |
| $R_e(\text{C}_{\alpha1}-\text{N}_m)$                          | 1.305 | $q(\text{H})$                                                    | 0.46     | $Q(\text{C}_{\beta2}-\text{C}_{\beta2})$  | 1.17  |
| $R_e(\text{C}_{\alpha2}-\text{N}_m)$                          | 1.325 | $q(\text{N}_{p1})$                                               | -0.51    | $Q(\text{C}_{\beta1}-\text{N}_{t1})$      | 1.51  |
| $R_e(\text{N}_{p1}\cdots\text{N}_{p1})$                       | 4.115 | $q(\text{N}_{p2})$                                               | -0.57    | $Q(\text{C}_{\beta2}-\text{N}_{t2})$      | 1.54  |
| $R_e(\text{N}_{p2}\cdots\text{N}_{p2})$                       | 3.984 | $q(\text{C}_{\alpha1})$                                          | 0.39     | $Q(\text{N}_{t1}-\text{S}_1)$             | 1.21  |
| $\alpha_e(\text{C}_{\alpha1}\text{N}_{p1}\text{C}_{\alpha1})$ | 114.8 | $q(\text{C}_{\alpha2})$                                          | 0.38     | $Q(\text{N}_{t2}-\text{S}_2)$             | 1.19  |
| $\alpha_e(\text{C}_{\alpha2}\text{N}_{p2}\text{C}_{\alpha2})$ | 109.5 | $q(\text{C}_{\beta1})$                                           | 0.09     | $Q(\text{C}_{\alpha1}-\text{N}_m)$        | 1.44  |
| $\alpha_e(\text{N}_{p1}\text{C}_{\alpha1}\text{C}_{\beta1})$  | 104.5 | $q(\text{C}_{\beta2})$                                           | 0.09     | $Q(\text{C}_{\alpha2}-\text{N}_m)$        | 1.35  |
| $\alpha_e(\text{N}_{p2}\text{C}_{\alpha2}\text{C}_{\beta2})$  | 109.1 |                                                                  |          |                                           |       |
|                                                               |       | [TTDPa] <sup>2-</sup>                                            | $D_{4h}$ |                                           |       |
| $R_e(\text{N}_p-\text{C}_\alpha)$                             | 1.352 | $\alpha_e(\text{C}_\alpha\text{C}_\beta\text{C}_\beta)$          | 105.7    | $q(\text{N}_t)$                           | -0.58 |
| $R_e(\text{C}_\alpha-\text{C}_\beta)$                         | 1.475 | $\alpha_e(\text{C}_\beta\text{C}_\beta\text{N}_t)$               | 115.2    | $q(\text{S})$                             | 0.68  |
| $R_e(\text{C}_\beta-\text{C}_\beta)$                          | 1.438 | $\alpha_e(\text{C}_\beta\text{N}_t\text{S})$                     | 105.1    | $q(\text{N}_m)$                           | -0.47 |
| $R_e(\text{C}_\beta-\text{N}_t)$                              | 1.311 | $\alpha_e(\text{N}_t\text{S}\text{N}_t)$                         | 99.4     | $Q(\text{N}_p-\text{C}_\alpha)$           | 1.33  |
| $R_e(\text{N}_t-\text{S})$                                    | 1.676 | $\alpha_e(\text{N}_p\text{C}_\alpha\text{N}_m)$                  | 128.9    | $Q(\text{C}_\alpha-\text{C}_\beta)$       | 1.03  |
| $R_e(\text{C}_\alpha-\text{N}_m)$                             | 1.329 | $\alpha_e(\text{C}_\alpha\text{N}_m\text{C}_\alpha)$             | 124.1    | $Q(\text{C}_\beta-\text{C}_\beta)$        | 1.13  |
| $R_e(\text{N}_p\cdots\text{N}_p)$                             | 4.042 | $q(\text{N}_p)$                                                  | -0.41    | $Q(\text{C}_\beta-\text{N}_t)$            | 1.57  |
| $\alpha_e(\text{C}_\alpha\text{N}_p\text{C}_\alpha)$          | 111.8 | $q(\text{C}_\alpha)$                                             | 0.33     | $Q(\text{N}_t-\text{S})$                  | 1.13  |
| $\alpha_e(\text{N}_p\text{C}_\alpha\text{C}_\beta)$           | 108.4 | $q(\text{C}_\beta)$                                              | 0.11     | $Q(\text{C}_\alpha-\text{N}_m)$           | 1.36  |



**Table S5.** Geometric parameters (bond length  $R_e$  in Å, bond angles  $\alpha_e$ ) atomic charges (NBO,  $q$ ) and Vyberg bond indices ( $Q$ ) for monoanions [TTDPaH]<sup>-</sup> (protonated  $N_p$ ) and {H[TTPa]}<sup>-</sup> (protonated  $N_m$ )

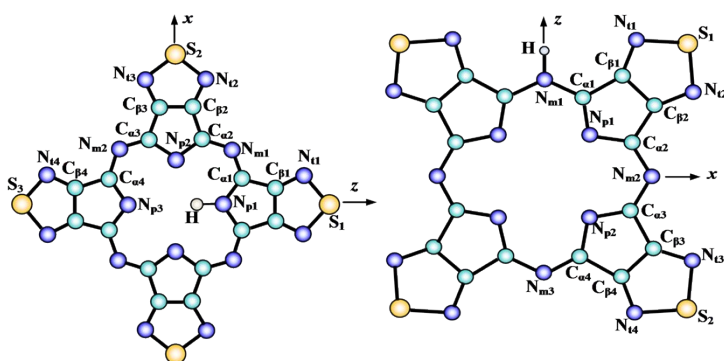

[TTDPaH]<sup>-</sup> (symmetry  $C_{2v}$ )  
protonation of  $N_p$

{H[TTPa]}<sup>-</sup> (symmetry  $C_{2v}$ )  
protonation of  $N_m$

| Protonation of $N_p$ : $h=0$            |       |                                             |       |                                             |       |
|-----------------------------------------|-------|---------------------------------------------|-------|---------------------------------------------|-------|
| $R_e(N_{p1}-H)$                         | 1.023 | $R_e(C_{\alpha3}-N_{m2})$                   | 1.323 | $\alpha_e(N_{p2}C_{\alpha2}C_{\beta2})$     | 109.3 |
| $R_e(N_{p1}-C_{\alpha1})$               | 1.390 | $R_e(C_{\alpha4}-N_{m2})$                   | 1.324 | $\alpha_e(N_{p2}C_{\alpha3}C_{\beta3})$     | 108.3 |
| $R_e(C_{\alpha1}-C_{\beta1})$           | 1.448 | $R_e(N_{p3}-C_{\alpha4})$                   | 1.352 | $\alpha_e(C_{\alpha2}C_{\beta2}C_{\beta3})$ | 105.5 |
| $R_e(C_{\beta1}-C_{\beta1})$            | 1.428 | $R_e(C_{\alpha4}-C_{\beta4})$               | 1.476 | $\alpha_e(C_{\beta3}C_{\beta2}N_{t2})$      | 115.4 |
| $R_e(C_{\beta1}-N_{t1})$                | 1.320 | $R_e(C_{\beta4}-C_{\beta4})$                | 1.427 | $\alpha_e(C_{\beta2}C_{\beta3}N_{t3})$      | 115.2 |
| $R_e(N_{t1}-S_1)$                       | 1.652 | $R_e(C_{\beta4}-N_{t4})$                    | 1.310 | $\alpha_e(C_{\beta2}N_{t2}S_2)$             | 104.8 |
| $R_e(C_{\alpha1}-N_{m1})$               | 1.311 | $R_e(N_{t4}-S_3)$                           | 1.669 | $\alpha_e(N_{t2}S_2N_{t3})$                 | 99.6  |
| $R_e(C_{\alpha2}-N_{m1})$               | 1.326 | $\alpha_e(C_{\alpha1}N_{p1}C_{\alpha1})$    | 114.2 | $\alpha_e(N_{p2}C_{\alpha3}N_{m2})$         | 129.4 |
| $R_e(N_{p2}-C_{\alpha2})$               | 1.352 | $\alpha_e(N_{p1}C_{\alpha1}C_{\beta1})$     | 104.7 | $\alpha_e(C_{\alpha3}N_{m2}C_{\alpha4})$    | 124.4 |
| $R_e(N_{p2}-C_{\alpha3})$               | 1.359 | $\alpha_e(C_{\alpha1}C_{\beta1}C_{\beta1})$ | 108.2 | $\alpha_e(N_{p3}C_{\alpha4}N_{m2})$         | 128.2 |
| $R_e(C_{\alpha2}-C_{\beta2})$           | 1.466 | $\alpha_e(C_{\beta1}C_{\beta1}N_{t1})$      | 114.9 | $\alpha_e(C_{\alpha4}N_{p3}C_{\alpha4})$    | 110.8 |
| $R_e(C_{\alpha3}-C_{\beta3})$           | 1.474 | $\alpha_e(C_{\beta1}N_{t1}S_1)$             | 104.8 | $\alpha_e(N_{p3}C_{\alpha4}C_{\beta4})$     | 108.9 |
| $R_e(C_{\beta2}-C_{\beta3})$            | 1.427 | $\alpha_e(N_{t1}S_1N_{t1})$                 | 100.5 | $\alpha_e(C_{\alpha4}C_{\beta4}C_{\beta4})$ | 105.7 |
| $R_e(C_{\beta2}-N_{t2})$                | 1.312 | $\alpha_e(N_{p1}C_{\alpha1}N_{m1})$         | 130.4 | $\alpha_e(C_{\beta4}C_{\beta4}N_{t4})$      | 115.3 |
| $R_e(C_{\beta3}-N_{t3})$                | 1.311 | $\alpha_e(C_{\alpha1}N_{m1}C_{\alpha2})$    | 124.1 | $\alpha_e(C_{\beta4}N_{t4}S_3)$             | 104.9 |
| $R_e(N_{t2}-S_2)$                       | 1.667 | $\alpha_e(N_{p2}C_{\alpha2}N_{m1})$         | 126.5 | $\alpha_e(N_{t4}S_3N_{t4})$                 | 99.5  |
| $R_e(N_{t3}-S_2)$                       | 1.666 | $\alpha_e(C_{\alpha2}N_{p2}C_{\alpha3})$    | 110.7 |                                             |       |
| Protonation of $N_m$ : $h=104.7$ kJ/mol |       |                                             |       |                                             |       |
| $R_e(N_{m1}-H)$                         | 1.010 | $R_e(C_{\alpha4}-C_{\beta4})$               | 1.478 | $\alpha_e(N_{p1}C_{\alpha1}N_{m1})$         | 124.9 |
| $R_e(N_{p1}-C_{\alpha1})$               | 1.320 | $R_e(C_{\beta3}-C_{\beta4})$                | 1.429 | $\alpha_e(C_{\alpha1}N_{m1}C_{\alpha1})$    | 129.3 |
| $R_e(N_{p1}-C_{\alpha2})$               | 1.368 | $R_e(C_{\beta3}-N_{t3})$                    | 1.310 | $\alpha_e(N_{p1}C_{\alpha2}N_{m2})$         | 128.2 |
| $R_e(C_{\alpha1}-C_{\beta1})$           | 1.456 | $R_e(C_{\beta4}-N_{t4})$                    | 1.310 | $\alpha_e(C_{\alpha2}N_{m2}C_{\alpha3})$    | 124.3 |
| $R_e(C_{\alpha2}-C_{\beta2})$           | 1.475 | $R_e(N_{t3}-S_2)$                           | 1.671 | $\alpha_e(N_{p2}C_{\alpha3}N_{m2})$         | 128.2 |
| $R_e(C_{\beta1}-C_{\beta2})$            | 1.433 | $R_e(N_{t4}-S_2)$                           | 1.670 | $\alpha_e(C_{\alpha3}N_{p2}C_{\alpha4})$    | 111.1 |
| $R_e(C_{\beta1}-N_{t1})$                | 1.311 | $R_e(C_{\alpha4}-N_{m3})$                   | 1.326 | $\alpha_e(N_{p2}C_{\alpha3}C_{\beta3})$     | 109.0 |
| $R_e(C_{\beta2}-N_{t2})$                | 1.312 | $\alpha_e(C_{\alpha1}N_{p1}C_{\alpha2})$    | 110.3 | $\alpha_e(N_{p2}C_{\alpha4}C_{\beta4})$     | 108.6 |
| $R_e(N_{t1}-S_1)$                       | 1.673 | $\alpha_e(N_{p1}C_{\alpha1}C_{\beta1})$     | 111.2 | $\alpha_e(C_{\alpha3}C_{\beta3}C_{\beta4})$ | 105.6 |
| $R_e(N_{t2}-S_1)$                       | 1.665 | $\alpha_e(N_{p1}C_{\alpha2}C_{\beta2})$     | 107.9 | $\alpha_e(C_{\beta4}C_{\beta3}N_{t3})$      | 115.4 |
| $R_e(C_{\alpha1}-N_{m1})$               | 1.361 | $\alpha_e(C_{\alpha1}C_{\beta1}C_{\beta2})$ | 104.7 | $\alpha_e(C_{\beta3}C_{\beta4}N_{t4})$      | 115.3 |
| $R_e(C_{\alpha2}-N_{m2})$               | 1.317 | $\alpha_e(C_{\beta2}C_{\beta1}N_{t1})$      | 116.0 | $\alpha_e(C_{\beta3}N_{t3}S_2)$             | 104.9 |
| $R_e(C_{\alpha3}-N_{m2})$               | 1.331 | $\alpha_e(C_{\beta1}C_{\beta2}N_{t2})$      | 114.2 | $\alpha_e(C_{\beta4}N_{t4}S_2)$             | 105.0 |
| $R_e(N_{p2}-C_{\alpha3})$               | 1.349 | $\alpha_e(C_{\beta1}N_{t1}S_1)$             | 104.5 | $\alpha_e(N_{t3}S_1N_{t4})$                 | 99.4  |
| $R_e(N_{p2}-C_{\alpha4})$               | 1.352 | $\alpha_e(C_{\beta2}N_{t2}S_1)$             | 105.8 | $\alpha_e(N_{p2}C_{\alpha4}N_{m3})$         | 128.7 |
| $R_e(C_{\alpha3}-C_{\beta3})$           | 1.475 | $\alpha_e(N_{t1}S_1N_{t2})$                 | 99.5  | $\alpha_e(C_{\alpha4}N_{m3}C_{\alpha4})$    | 125.0 |

**Table S6.** Cartesian coordinates (in Å) of atoms and total energies for optimized molecular structures.1. [TTDPaLi<sub>2</sub>], D<sub>4h</sub> structure

| Charge | X            | Y            | Z            |
|--------|--------------|--------------|--------------|
| 3      | 0.000000000  | 0.000000000  | -1.007889151 |
| 3      | 0.000000000  | 0.000000000  | 1.007889151  |
| 7      | 0.000000000  | 1.972077549  | 0.000000000  |
| 7      | -1.972077549 | 0.000000000  | 0.000000000  |
| 7      | 0.000000000  | -1.972077549 | 0.000000000  |
| 7      | 1.972077549  | 0.000000000  | 0.000000000  |
| 6      | -1.125868606 | 2.768444196  | 0.000000000  |
| 6      | -2.768444196 | -1.125868606 | 0.000000000  |
| 6      | 1.125868606  | -2.768444196 | 0.000000000  |
| 6      | 2.768444196  | -1.125868606 | 0.000000000  |
| 6      | 1.125868606  | 2.768444196  | 0.000000000  |
| 6      | -2.768444196 | 1.125868606  | 0.000000000  |
| 6      | -1.125868606 | -2.768444196 | 0.000000000  |
| 6      | 2.768444196  | 1.125868606  | 0.000000000  |
| 6      | -0.708865954 | 4.164256249  | 0.000000000  |
| 6      | -4.164256249 | -0.708865954 | 0.000000000  |
| 6      | 0.708865954  | -4.164256249 | 0.000000000  |
| 6      | 4.164256249  | -0.708865954 | 0.000000000  |
| 6      | 0.708865954  | 4.164256249  | 0.000000000  |
| 6      | -4.164256249 | 0.708865954  | 0.000000000  |
| 6      | -0.708865954 | -4.164256249 | 0.000000000  |
| 6      | 4.164256249  | 0.708865954  | 0.000000000  |
| 7      | -1.269056864 | 5.356362132  | 0.000000000  |
| 7      | -5.356362132 | -1.269056864 | 0.000000000  |
| 7      | 1.269056864  | -5.356362132 | 0.000000000  |
| 7      | 5.356362132  | -1.269056864 | 0.000000000  |
| 7      | 1.269056864  | 5.356362132  | 0.000000000  |
| 7      | -5.356362132 | 1.269056864  | 0.000000000  |
| 7      | -1.269056864 | -5.356362132 | 0.000000000  |
| 7      | 5.356362132  | 1.269056864  | 0.000000000  |
| 16     | 0.000000000  | 6.417416663  | 0.000000000  |
| 16     | -6.417416663 | 0.000000000  | 0.000000000  |
| 16     | 0.000000000  | -6.417416663 | 0.000000000  |
| 16     | 6.417416663  | 0.000000000  | 0.000000000  |
| 7      | -2.386210636 | 2.386210636  | 0.000000000  |
| 7      | -2.386210636 | -2.386210636 | 0.000000000  |
| 7      | 2.386210636  | -2.386210636 | 0.000000000  |
| 7      | 2.386210636  | 2.386210636  | 0.000000000  |

TOTAL ENERGY = -3093.1708496553 (Ha)



2. [TTDPaLi<sub>2</sub>], C<sub>2h</sub> structure

| Charge | X            | Y            | Z            |
|--------|--------------|--------------|--------------|
| 3      | -0.068567028 | -1.007494935 | 0.000000000  |
| 3      | 0.068567028  | 1.007494935  | 0.000000000  |
| 7      | 0.000000000  | 0.000000000  | -1.969635697 |
| 7      | 0.000000000  | 0.000000000  | 1.969635697  |
| 7      | -1.975923922 | -0.037914635 | 0.000000000  |
| 7      | 1.975923922  | 0.037914635  | 0.000000000  |
| 6      | -1.126026695 | -0.006691979 | 2.766386269  |
| 6      | 1.126026695  | 0.006691979  | -2.766386269 |
| 6      | -1.126026695 | -0.006691979 | -2.766386269 |
| 6      | 1.126026695  | 0.006691979  | 2.766386269  |
| 6      | -2.771127344 | -0.018533834 | 1.125843971  |
| 6      | 2.771127344  | 0.018533834  | -1.125843971 |
| 6      | -2.771127344 | -0.018533834 | -1.125843971 |
| 6      | 2.771127344  | 0.018533834  | 1.125843971  |
| 6      | -0.708810514 | -0.002841255 | 4.162079826  |
| 6      | 0.708810514  | 0.002841255  | -4.162079826 |
| 6      | -0.708810514 | -0.002841255 | -4.162079826 |
| 6      | 0.708810514  | 0.002841255  | 4.162079826  |
| 6      | -4.166897555 | 0.003090814  | 0.708996101  |
| 6      | 4.166897555  | -0.003090814 | -0.708996101 |
| 6      | -4.166897555 | 0.003090814  | -0.708996101 |
| 6      | 4.166897555  | -0.003090814 | 0.708996101  |
| 7      | -5.358758590 | 0.022040843  | 1.269051403  |
| 7      | 5.358758590  | -0.022040843 | -1.269051403 |
| 7      | -5.358758590 | 0.022040843  | -1.269051403 |
| 7      | 5.358758590  | -0.022040843 | 1.269051403  |
| 16     | 0.000000000  | 0.000000000  | -6.415216922 |
| 16     | 0.000000000  | 0.000000000  | 6.415216922  |
| 16     | -6.419777155 | 0.037950405  | 0.000000000  |
| 16     | 6.419777155  | -0.037950405 | 0.000000000  |
| 7      | -1.269026800 | -0.005080652 | 5.354210785  |
| 7      | 1.269026800  | 0.005080652  | -5.354210785 |
| 7      | -1.269026800 | -0.005080652 | -5.354210785 |
| 7      | 1.269026800  | 0.005080652  | 5.354210785  |
| 7      | -2.386874818 | -0.013442650 | 2.385575604  |
| 7      | 2.386874818  | 0.013442650  | -2.385575604 |
| 7      | -2.386874818 | -0.013442650 | -2.385575604 |
| 7      | 2.386874818  | 0.013442650  | 2.385575604  |

TOTAL ENERGY = -3093.1708629450 (Ha)

3. [TTDPaLi]<sup>-</sup>, D<sub>4h</sub> structure

| Charge | X            | Y            | Z           |
|--------|--------------|--------------|-------------|
| 3      | 0.000000000  | 0.000000000  | 0.000000000 |
| 7      | 2.011131824  | 0.000000000  | 0.000000000 |
| 7      | 0.000000000  | 2.011131824  | 0.000000000 |
| 7      | -2.011131824 | 0.000000000  | 0.000000000 |
| 7      | 0.000000000  | -2.011131824 | 0.000000000 |
| 6      | 2.780811676  | 1.125414852  | 0.000000000 |
| 6      | -1.125414852 | 2.780811676  | 0.000000000 |
| 6      | -2.780811676 | -1.125414852 | 0.000000000 |
| 6      | 1.125414852  | 2.780811676  | 0.000000000 |
| 6      | -2.780811676 | 1.125414852  | 0.000000000 |
| 6      | -1.125414852 | -2.780811676 | 0.000000000 |
| 6      | 2.780811676  | -1.125414852 | 0.000000000 |
| 6      | 1.125414852  | -2.780811676 | 0.000000000 |
| 6      | 4.188085286  | 0.713826734  | 0.000000000 |
| 6      | -0.713826734 | 4.188085286  | 0.000000000 |
| 6      | -4.188085286 | -0.713826734 | 0.000000000 |
| 6      | 0.713826734  | 4.188085286  | 0.000000000 |
| 6      | -4.188085286 | 0.713826734  | 0.000000000 |
| 6      | -0.713826734 | -4.188085286 | 0.000000000 |
| 6      | 4.188085286  | -0.713826734 | 0.000000000 |
| 6      | 0.713826734  | -4.188085286 | 0.000000000 |
| 7      | 5.376487477  | 1.272790427  | 0.000000000 |
| 7      | -1.272790427 | 5.376487477  | 0.000000000 |
| 7      | -5.376487477 | -1.272790427 | 0.000000000 |
| 7      | 1.272790427  | 5.376487477  | 0.000000000 |
| 7      | -5.376487477 | 1.272790427  | 0.000000000 |
| 7      | -1.272790427 | -5.376487477 | 0.000000000 |
| 7      | 5.376487477  | -1.272790427 | 0.000000000 |
| 7      | 1.272790427  | -5.376487477 | 0.000000000 |
| 16     | 6.448054629  | 0.000000000  | 0.000000000 |
| 16     | 0.000000000  | 6.448054629  | 0.000000000 |
| 16     | -6.448054629 | 0.000000000  | 0.000000000 |
| 16     | 0.000000000  | -6.448054629 | 0.000000000 |
| 7      | 2.388828596  | 2.388828596  | 0.000000000 |
| 7      | -2.388828596 | 2.388828596  | 0.000000000 |
| 7      | -2.388828596 | -2.388828596 | 0.000000000 |
| 7      | 2.388828596  | -2.388828596 | 0.000000000 |

TOTAL ENERGY = -3085.7148700722 (Ha)

4.  $\text{H}^+[\text{TTDPaLi}]^-$ ,  $C_{2v}$  structure

| Charge | X            | Y           | Z            |
|--------|--------------|-------------|--------------|
| 3      | 0.000000000  | 0.000000000 | -0.019725753 |
| 7      | -1.432234768 | 0.000000000 | 1.422109782  |
| 7      | 1.432234768  | 0.000000000 | 1.422109782  |
| 7      | -1.424886681 | 0.000000000 | -1.414966720 |
| 7      | 1.424886681  | 0.000000000 | -1.414966720 |
| 6      | -2.785192700 | 0.000000000 | 1.163362343  |
| 6      | 2.785192700  | 0.000000000 | 1.163362343  |
| 6      | -1.171987534 | 0.000000000 | -2.754124480 |
| 6      | 1.171987534  | 0.000000000 | -2.754124480 |
| 6      | -2.766944846 | 0.000000000 | -1.177587535 |
| 6      | 2.766944846  | 0.000000000 | -1.177587535 |
| 6      | -1.222895331 | 0.000000000 | 2.741250857  |
| 6      | 1.222895331  | 0.000000000 | 2.741250857  |
| 6      | -3.485398444 | 0.000000000 | 2.451544540  |
| 6      | 3.485398444  | 0.000000000 | 2.451544540  |
| 6      | -2.456856757 | 0.000000000 | -3.465804607 |
| 6      | 2.456856757  | 0.000000000 | -3.465804607 |
| 6      | -3.466754414 | 0.000000000 | -2.466538123 |
| 6      | 3.466754414  | 0.000000000 | -2.466538123 |
| 6      | -2.479158339 | 0.000000000 | 3.459489583  |
| 6      | 2.479158339  | 0.000000000 | 3.459489583  |
| 7      | -4.714114087 | 0.000000000 | 2.917854490  |
| 7      | 4.714114087  | 0.000000000 | 2.917854490  |
| 7      | -2.894231145 | 0.000000000 | -4.702606930 |
| 7      | 2.894231145  | 0.000000000 | -4.702606930 |
| 7      | -4.699538525 | 0.000000000 | -2.916255009 |
| 7      | 4.699538525  | 0.000000000 | -2.916255009 |
| 7      | -2.908865702 | 0.000000000 | 4.700885105  |
| 7      | 2.908865702  | 0.000000000 | 4.700885105  |
| 16     | -4.565620444 | 0.000000000 | 4.565710141  |
| 16     | 4.565620444  | 0.000000000 | 4.565710141  |
| 16     | -4.548980866 | 0.000000000 | -4.569907543 |
| 16     | 4.548980866  | 0.000000000 | -4.569907543 |
| 7      | -3.384791357 | 0.000000000 | -0.007519446 |
| 7      | 3.384791357  | 0.000000000 | -0.007519446 |
| 7      | 0.000000000  | 0.000000000 | -3.364771018 |
| 7      | 0.000000000  | 0.000000000 | 3.322842155  |
| 1      | 0.000000000  | 0.000000000 | 4.335451606  |

TOTAL ENERGY = -3086.1986341181 (Ha)

5. [TTDPaHLi],  $C_s$  structure

| Charge | X            | Y            | Z            |
|--------|--------------|--------------|--------------|
| 1      | -1.257922567 | -0.792665280 | 0.000000000  |
| 3      | 0.190566062  | 0.551071505  | 0.000000000  |
| 7      | -0.021997936 | 0.053803128  | 1.961368319  |
| 7      | -0.021997936 | 0.053803128  | -1.961368319 |
| 7      | -2.100962487 | -0.238805880 | 0.000000000  |
| 7      | 2.050028767  | 0.317362383  | 0.000000000  |
| 6      | -1.126556605 | -0.103375899 | 2.765470138  |
| 6      | -1.126556605 | -0.103375899 | -2.765470138 |
| 6      | -2.839473982 | -0.078377842 | 1.175438144  |
| 6      | -2.839473982 | -0.078377842 | -1.175438144 |
| 6      | 1.117616630  | 0.070629235  | 2.732318770  |
| 6      | 1.117616630  | 0.070629235  | -2.732318770 |
| 6      | 2.812971488  | 0.268306232  | 1.123911259  |
| 6      | 2.812971488  | 0.268306232  | -1.123911259 |
| 6      | -0.687870332 | -0.197386246 | 4.153401709  |
| 6      | -0.687870332 | -0.197386246 | -4.153401709 |
| 6      | -4.178363338 | 0.199063706  | 0.715322000  |
| 6      | -4.178363338 | 0.199063706  | -0.715322000 |
| 6      | 0.724954402  | -0.088266681 | 4.133141568  |
| 6      | 0.724954402  | -0.088266681 | -4.133141568 |
| 6      | 4.221944234  | 0.257820861  | 0.711969824  |
| 6      | 4.221944234  | 0.257820861  | -0.711969824 |
| 7      | -1.222975430 | -0.350309854 | 5.344809003  |
| 7      | -1.222975430 | -0.350309854 | -5.344809003 |
| 7      | -5.346318866 | 0.482565205  | 1.266460847  |
| 7      | -5.346318866 | 0.482565205  | -1.266460847 |
| 7      | 1.307150837  | -0.149239451 | 5.309994638  |
| 7      | 1.307150837  | -0.149239451 | -5.309994638 |
| 7      | 5.409369412  | 0.232387372  | 1.269444305  |
| 7      | 5.409369412  | 0.232387372  | -1.269444305 |
| 16     | 0.064669670  | -0.344163035 | 6.387953800  |
| 16     | 0.064669670  | -0.344163035 | -6.387953800 |
| 16     | -6.367819898 | 0.713968708  | 0.000000000  |
| 16     | 6.477709612  | 0.215108684  | 0.000000000  |
| 7      | -2.400085834 | -0.110316916 | 2.405186611  |
| 7      | -2.400085834 | -0.110316916 | -2.405186611 |
| 7      | 2.384531948  | 0.184830997  | 2.367646651  |
| 7      | 2.384531948  | 0.184830997  | -2.367646651 |

TOTAL ENERGY = -3086.1729795300 (Ha)

6. [TTDPaH<sub>2</sub>], D<sub>2h</sub> structure

| Charge | X            | Y            | Z           |
|--------|--------------|--------------|-------------|
| 7      | 2.057275462  | 0.000000000  | 0.000000000 |
| 7      | -2.057275462 | 0.000000000  | 0.000000000 |
| 7      | 0.000000000  | -1.991978537 | 0.000000000 |
| 7      | 0.000000000  | 1.991978537  | 0.000000000 |
| 6      | 2.802117689  | -1.164454947 | 0.000000000 |
| 6      | -2.802117689 | -1.164454947 | 0.000000000 |
| 6      | 2.802117689  | 1.164454947  | 0.000000000 |
| 6      | -2.802117689 | 1.164454947  | 0.000000000 |
| 6      | 1.114796604  | -2.780000051 | 0.000000000 |
| 6      | -1.114796604 | -2.780000051 | 0.000000000 |
| 6      | 1.114796604  | 2.780000051  | 0.000000000 |
| 6      | -1.114796604 | 2.780000051  | 0.000000000 |
| 6      | 4.181928644  | -0.712624171 | 0.000000000 |
| 6      | -4.181928644 | -0.712624171 | 0.000000000 |
| 6      | 4.181928644  | 0.712624171  | 0.000000000 |
| 6      | -4.181928644 | 0.712624171  | 0.000000000 |
| 6      | 0.708605737  | -4.186685996 | 0.000000000 |
| 6      | -0.708605737 | -4.186685996 | 0.000000000 |
| 6      | 0.708605737  | 4.186685996  | 0.000000000 |
| 6      | -0.708605737 | 4.186685996  | 0.000000000 |
| 7      | 5.377315252  | -1.267213294 | 0.000000000 |
| 7      | -5.377315252 | -1.267213294 | 0.000000000 |
| 7      | 5.377315252  | 1.267213294  | 0.000000000 |
| 7      | -5.377315252 | 1.267213294  | 0.000000000 |
| 7      | 1.269732958  | -5.373859070 | 0.000000000 |
| 7      | -1.269732958 | -5.373859070 | 0.000000000 |
| 7      | 1.269732958  | 5.373859070  | 0.000000000 |
| 7      | -1.269732958 | 5.373859070  | 0.000000000 |
| 16     | 6.432549748  | 0.000000000  | 0.000000000 |
| 16     | -6.432549748 | 0.000000000  | 0.000000000 |
| 16     | 0.000000000  | -6.442330953 | 0.000000000 |
| 16     | 0.000000000  | 6.442330953  | 0.000000000 |
| 7      | 2.384557245  | -2.401235982 | 0.000000000 |
| 7      | -2.384557245 | -2.401235982 | 0.000000000 |
| 7      | 2.384557245  | 2.401235982  | 0.000000000 |
| 7      | -2.384557245 | 2.401235982  | 0.000000000 |
| 1      | 1.046618324  | 0.000000000  | 0.000000000 |
| 1      | -1.046618324 | 0.000000000  | 0.000000000 |

TOTAL ENERGY = -3079.1691980653 (Ha)

7. [TTDPa]<sup>2-</sup>, D<sub>4h</sub> structure

| Charge | X            | Y            | Z           |
|--------|--------------|--------------|-------------|
| 7      | 2.020945579  | 0.000000000  | 0.000000000 |
| 7      | 0.000000000  | 2.020945579  | 0.000000000 |
| 7      | -2.020945579 | 0.000000000  | 0.000000000 |
| 7      | 0.000000000  | -2.020945579 | 0.000000000 |
| 6      | 2.778942988  | 1.119165590  | 0.000000000 |
| 6      | -1.119165590 | 2.778942988  | 0.000000000 |
| 6      | -2.778942988 | -1.119165590 | 0.000000000 |
| 6      | 1.119165590  | 2.778942988  | 0.000000000 |
| 6      | -2.778942988 | 1.119165590  | 0.000000000 |
| 6      | -1.119165590 | -2.778942988 | 0.000000000 |
| 6      | 2.778942988  | -1.119165590 | 0.000000000 |
| 6      | 1.119165590  | -2.778942988 | 0.000000000 |
| 6      | 4.198802090  | 0.719183150  | 0.000000000 |
| 6      | -0.719183150 | 4.198802090  | 0.000000000 |
| 6      | -4.198802090 | -0.719183150 | 0.000000000 |
| 6      | 0.719183150  | 4.198802090  | 0.000000000 |
| 6      | -4.198802090 | 0.719183150  | 0.000000000 |
| 6      | -0.719183150 | -4.198802090 | 0.000000000 |
| 6      | 4.198802090  | -0.719183150 | 0.000000000 |
| 6      | 0.719183150  | -4.198802090 | 0.000000000 |
| 7      | 5.384573341  | 1.278255297  | 0.000000000 |
| 7      | -1.278255297 | 5.384573341  | 0.000000000 |
| 7      | -5.384573341 | -1.278255297 | 0.000000000 |
| 7      | 1.278255297  | 5.384573341  | 0.000000000 |
| 7      | -5.384573341 | 1.278255297  | 0.000000000 |
| 7      | -1.278255297 | -5.384573341 | 0.000000000 |
| 7      | 5.384573341  | -1.278255297 | 0.000000000 |
| 7      | 1.278255297  | -5.384573341 | 0.000000000 |
| 16     | 6.468418231  | 0.000000000  | 0.000000000 |
| 16     | 0.000000000  | 6.468418231  | 0.000000000 |
| 16     | -6.468418231 | 0.000000000  | 0.000000000 |
| 16     | 0.000000000  | -6.468418231 | 0.000000000 |
| 7      | 2.389641236  | 2.389641236  | 0.000000000 |
| 7      | -2.389641236 | 2.389641236  | 0.000000000 |
| 7      | -2.389641236 | -2.389641236 | 0.000000000 |
| 7      | 2.389641236  | -2.389641236 | 0.000000000 |

TOTAL ENERGY = -3078.0230506409 (Ha)

8. [TTDPaH]<sup>-</sup>, C<sub>2v</sub> structure

| Charge | X            | Y           | Z            |
|--------|--------------|-------------|--------------|
| 7      | 2.024606944  | 0.000000000 | -0.037117703 |
| 7      | -2.024606944 | 0.000000000 | -0.037117703 |
| 7      | 0.000000000  | 0.000000000 | -2.016820145 |
| 7      | 0.000000000  | 0.000000000 | 1.984913813  |
| 6      | 2.770589290  | 0.000000000 | 1.098899306  |
| 6      | -2.770589290 | 0.000000000 | 1.098899306  |
| 6      | 1.166848838  | 0.000000000 | -2.771890074 |
| 6      | -1.166848838 | 0.000000000 | -2.771890074 |
| 6      | 1.112848329  | 0.000000000 | 2.752385105  |
| 6      | -1.112848329 | 0.000000000 | 2.752385105  |
| 6      | 2.820358573  | 0.000000000 | -1.130570947 |
| 6      | -2.820358573 | 0.000000000 | -1.130570947 |
| 6      | 4.194204162  | 0.000000000 | 0.717429165  |
| 6      | -4.194204162 | 0.000000000 | 0.717429165  |
| 6      | 0.714017402  | 0.000000000 | -4.147476078 |
| 6      | -0.714017402 | 0.000000000 | -4.147476078 |
| 6      | 0.713378705  | 0.000000000 | 4.173196920  |
| 6      | -0.713378705 | 0.000000000 | 4.173196920  |
| 6      | 4.224990426  | 0.000000000 | -0.709214574 |
| 6      | -4.224990426 | 0.000000000 | -0.709214574 |
| 7      | 5.369037984  | 0.000000000 | 1.300287758  |
| 7      | -5.369037984 | 0.000000000 | 1.300287758  |
| 7      | 1.270167535  | 0.000000000 | -5.344408845 |
| 7      | -1.270167535 | 0.000000000 | -5.344408845 |
| 7      | 1.273952328  | 0.000000000 | 5.357224041  |
| 7      | -1.273952328 | 0.000000000 | 5.357224041  |
| 7      | 5.421871592  | 0.000000000 | -1.246218405 |
| 7      | -5.421871592 | 0.000000000 | -1.246218405 |
| 16     | 6.470792433  | 0.000000000 | 0.050015140  |
| 16     | -6.470792433 | 0.000000000 | 0.050015140  |
| 16     | 0.000000000  | 0.000000000 | -6.401351383 |
| 16     | 0.000000000  | 0.000000000 | 6.436178263  |
| 7      | 2.377546845  | 0.000000000 | 2.361888182  |
| 7      | -2.377546845 | 0.000000000 | 2.361888182  |
| 7      | 2.422666813  | 0.000000000 | -2.395489072 |
| 7      | -2.422666813 | 0.000000000 | -2.395489072 |
| 1      | 0.000000000  | 0.000000000 | -0.993932614 |

TOTAL ENERGY = -3078.6621634009 (Ha)



9. H[TTDPa]<sup>-</sup>, C<sub>2v</sub> structure

| Charge | X            | Y           | Z            |
|--------|--------------|-------------|--------------|
| 7      | 1.448359490  | 0.000000000 | 1.415590459  |
| 7      | -1.448359490 | 0.000000000 | 1.415590459  |
| 7      | 1.437863599  | 0.000000000 | -1.414302865 |
| 7      | -1.437863599 | 0.000000000 | -1.414302865 |
| 6      | 2.792274360  | 0.000000000 | 1.158870397  |
| 6      | -2.792274360 | 0.000000000 | 1.158870397  |
| 6      | 1.175729157  | 0.000000000 | -2.741065887 |
| 6      | -1.175729157 | 0.000000000 | -2.741065887 |
| 6      | 2.766491899  | 0.000000000 | -1.182818769 |
| 6      | -2.766491899 | 0.000000000 | -1.182818769 |
| 6      | 1.230161355  | 0.000000000 | 2.717770436  |
| 6      | -1.230161355 | 0.000000000 | 2.717770436  |
| 6      | 3.501466815  | 0.000000000 | 2.452289567  |
| 6      | -3.501466815 | 0.000000000 | 2.452289567  |
| 6      | 2.458121658  | 0.000000000 | -3.475697902 |
| 6      | -2.458121658 | 0.000000000 | -3.475697902 |
| 6      | 3.478422934  | 0.000000000 | -2.474760694 |
| 6      | -3.478422934 | 0.000000000 | -2.474760694 |
| 6      | 2.482271304  | 0.000000000 | 3.460140063  |
| 6      | -2.482271304 | 0.000000000 | 3.460140063  |
| 7      | 4.725015300  | 0.000000000 | 2.924883756  |
| 7      | -4.725015300 | 0.000000000 | 2.924883756  |
| 7      | 2.888712920  | 0.000000000 | -4.712471293 |
| 7      | -2.888712920 | 0.000000000 | -4.712471293 |
| 7      | 4.707692160  | 0.000000000 | -2.927006081 |
| 7      | -4.707692160 | 0.000000000 | -2.927006081 |
| 7      | 2.901191141  | 0.000000000 | 4.702258920  |
| 7      | -2.901191141 | 0.000000000 | 4.702258920  |
| 16     | 4.569416298  | 0.000000000 | 4.582546201  |
| 16     | -4.569416298 | 0.000000000 | 4.582546201  |
| 16     | 4.554668809  | 0.000000000 | -4.590881369 |
| 16     | -4.554668809 | 0.000000000 | -4.590881369 |
| 7      | 3.397804638  | 0.000000000 | -0.010554767 |
| 7      | -3.397804638 | 0.000000000 | -0.010554767 |
| 7      | 0.000000000  | 0.000000000 | -3.353301773 |
| 7      | 0.000000000  | 0.000000000 | 3.301061314  |
| 1      | 0.000000000  | 0.000000000 | 4.311226480  |

TOTAL ENERGY = -3078.6222830322 (Ha)

**Table S7.** Wavelength ( $\lambda$ , nm) and oscillator strength (in parenthesis), corresponding to the energies of the electronic transitions <sup>a)</sup> from the ground<sup>b)</sup> to the excited singlet states.

|                                                                        | electronic transition                                                               | $\lambda$  | Term                                                                             | electronic transition                                                                | $\lambda$  |
|------------------------------------------------------------------------|-------------------------------------------------------------------------------------|------------|----------------------------------------------------------------------------------|--------------------------------------------------------------------------------------|------------|
| <b>[<math>\mu</math>-(TTDPa) Li<sub>2</sub>]</b>                       |                                                                                     |            |                                                                                  |                                                                                      |            |
| 1 <sup>1</sup> E <sub>u</sub>                                          | 2a <sub>1u</sub> → 7e <sub>g</sub> (90)                                             | 615(0.481) | 8 <sup>1</sup> E <sub>u</sub>                                                    | 6a <sub>2u</sub> → 8e <sub>g</sub> (76); 6e <sub>g</sub> → 7a <sub>2u</sub> (14)     | 255(0.671) |
| 2 <sup>1</sup> E <sub>u</sub>                                          | 2a <sub>1u</sub> → 8e <sub>g</sub> (85); 6a <sub>2u</sub> → 7e <sub>g</sub> (12)    | 398(0.019) | 9 <sup>1</sup> E <sub>u</sub>                                                    | 6e <sub>g</sub> → 7a <sub>2u</sub> (25); 4b <sub>2u</sub> → 8e <sub>g</sub> (24);    | 250(0.515) |
| 3 <sup>1</sup> E <sub>u</sub>                                          | 4b <sub>2u</sub> → 7e <sub>g</sub> (82); 5a <sub>2u</sub> → 7e <sub>g</sub> (14)    | 363(0.092) |                                                                                  | 2b <sub>1u</sub> → 7e <sub>g</sub> (20); 1a <sub>1u</sub> → 7e <sub>g</sub> (14);    |            |
| 5 <sup>1</sup> E <sub>u</sub>                                          | 6a <sub>2u</sub> → 7e <sub>g</sub> (75); 2a <sub>1u</sub> → 8e <sub>g</sub> (10)    | 325(2.122) | 12 <sup>1</sup> E <sub>u</sub>                                                   | 1a <sub>1u</sub> → 7e <sub>g</sub> (58); 5a <sub>2u</sub> → 8e <sub>g</sub> (24)     | 231(0.160) |
| <b>[TTDPaLi]<sup>-</sup></b>                                           |                                                                                     |            |                                                                                  |                                                                                      |            |
| 1 <sup>1</sup> E <sub>u</sub>                                          | 2a <sub>1u</sub> → 7e <sub>g</sub> (88)                                             | 588(0.454) | 5 <sup>1</sup> E <sub>u</sub>                                                    | 4a <sub>2u</sub> → 7e <sub>g</sub> (82); 5a <sub>2u</sub> → 8e <sub>g</sub> (12)     | 305(0.451) |
| 2 <sup>1</sup> E <sub>u</sub>                                          | 2a <sub>1u</sub> → 8e <sub>g</sub> (86); 5a <sub>2u</sub> → 7e <sub>g</sub> (13)    | 428(0.082) | 6 <sup>1</sup> E <sub>u</sub>                                                    | 5a <sub>2u</sub> → 8e <sub>g</sub> (83); 4a <sub>2u</sub> → 7e <sub>g</sub> (10)     | 285(1.026) |
| 3 <sup>1</sup> E <sub>u</sub>                                          | 5a <sub>2u</sub> → 7e <sub>g</sub> (44); 4b <sub>2u</sub> → 7e <sub>g</sub> (33)    | 344(1.006) | 8 <sup>1</sup> E <sub>u</sub>                                                    | 6e <sub>g</sub> → 6a <sub>2u</sub> (48); 6e <sub>g</sub> → 5b <sub>2u</sub> (37)     | 261(0.466) |
| 4 <sup>1</sup> E <sub>u</sub>                                          | 4b <sub>2u</sub> → 7e <sub>g</sub> (61); 5a <sub>2u</sub> → 7e <sub>g</sub> (29)    | 324(0.362) | 11 <sup>1</sup> E <sub>u</sub>                                                   | 2b <sub>1u</sub> → 7e <sub>g</sub> (69); 4a <sub>2u</sub> → 8e <sub>g</sub> (24)     | 234(0.252) |
| <b>[TTDPa]<sup>2-</sup></b>                                            |                                                                                     |            |                                                                                  |                                                                                      |            |
| 1 <sup>1</sup> E <sub>u</sub>                                          | 2a <sub>1u</sub> → 7e <sub>g</sub> (85)                                             | 596(0.288) | 6 <sup>1</sup> E <sub>u</sub>                                                    | 6e <sub>g</sub> → 6a <sub>2u</sub> (44); 4a <sub>2u</sub> → 7e <sub>g</sub> (33);    | 276(0.118) |
| 2 <sup>1</sup> E <sub>u</sub>                                          | 2a <sub>1u</sub> → 8e <sub>g</sub> (78); 5a <sub>2u</sub> → 7e <sub>g</sub> (20)    | 473(0.138) |                                                                                  | 6e <sub>g</sub> → 5b <sub>2u</sub> (22)                                              |            |
| 1 <sup>1</sup> A <sub>2u</sub>                                         | 16b <sub>1g</sub> → 5b <sub>2u</sub> (74); 28e <sub>u</sub> → 7e <sub>g</sub> (24)  | 402(0.001) | 7 <sup>1</sup> E <sub>u</sub>                                                    | 4a <sub>2u</sub> → 7e <sub>g</sub> (62); 6e <sub>g</sub> → 5b <sub>2u</sub> (18);    | 275(0.699) |
| 3 <sup>1</sup> E <sub>u</sub>                                          | 5a <sub>2u</sub> → 7e <sub>g</sub> (53); 5a <sub>2u</sub> → 8e <sub>g</sub> (28)    | 371(0.653) |                                                                                  | 6e <sub>g</sub> → 6a <sub>2u</sub> (16)                                              |            |
| 4 <sup>1</sup> E <sub>u</sub>                                          | 5a <sub>2u</sub> → 8e <sub>g</sub> (65); 5a <sub>2u</sub> → 7e <sub>g</sub> (13)    | 333(1.522) | 8 <sup>1</sup> E <sub>u</sub>                                                    | 6e <sub>g</sub> → 5b <sub>2u</sub> (58); 6e <sub>g</sub> → 6a <sub>2u</sub> (35)     | 269(0.470) |
| 5 <sup>1</sup> E <sub>u</sub>                                          | 4b <sub>2u</sub> → 7e <sub>g</sub> (88)                                             | 303(0.086) |                                                                                  |                                                                                      |            |
| <b>[TTDPaH<sub>2</sub>]</b>                                            |                                                                                     |            |                                                                                  |                                                                                      |            |
| 1 <sup>1</sup> B <sub>2u</sub>                                         | 4a <sub>u</sub> → 7b <sub>2g</sub> (91)                                             | 609(0.286) | 4 <sup>1</sup> B <sub>2u</sub>                                                   | 7b <sub>1u</sub> → 7b <sub>3g</sub> (60); 8b <sub>1u</sub> → 7b <sub>3g</sub> (38);  | 325(0.148) |
| 1 <sup>1</sup> B <sub>3u</sub>                                         | 4a <sub>u</sub> → 7b <sub>3g</sub> (86)                                             | 570(0.252) | 5 <sup>1</sup> B <sub>3u</sub>                                                   | 7b <sub>1u</sub> → 7b <sub>2g</sub> (74); 8b <sub>1u</sub> → 7b <sub>2g</sub> (12)   | 312(0.260) |
| 2 <sup>1</sup> B <sub>3u</sub>                                         | 9b <sub>1u</sub> → 7b <sub>2g</sub> (90)                                            | 414(0.058) | 5 <sup>1</sup> B <sub>2u</sub>                                                   | 8b <sub>1u</sub> → 7b <sub>3g</sub> (42); 7b <sub>1u</sub> → 7b <sub>3g</sub> (34)   | 305(0.967) |
| 2 <sup>1</sup> B <sub>2u</sub>                                         | 4a <sub>u</sub> → 8b <sub>2g</sub> (59)                                             | 391(0.058) | 8 <sup>1</sup> B <sub>2u</sub>                                                   | 6b <sub>3g</sub> → 11b <sub>1u</sub> (44); 9b <sub>1u</sub> → 8b <sub>3g</sub> (23); | 253(0.575) |
|                                                                        |                                                                                     |            | 3a <sub>u</sub> → 7b <sub>2g</sub> (16); 2a <sub>u</sub> → 7b <sub>2g</sub> (13) |                                                                                      |            |
| 4 <sup>1</sup> B <sub>3u</sub>                                         | 8b <sub>1u</sub> → 7b <sub>2g</sub> (90); 7b <sub>1u</sub> → 7b <sub>2g</sub> (20)  | 330(1.039) | 8 <sup>1</sup> B <sub>3u</sub>                                                   | 6b <sub>2g</sub> → 10b <sub>1u</sub> (76)                                            | 249(0.363) |
| <b>[TTDPzLiH], C<sub>s</sub> (protonated N<sub>p</sub>)</b>            |                                                                                     |            |                                                                                  |                                                                                      |            |
| 1 <sup>1</sup> A''                                                     | 60a'' → 79a'(91)                                                                    | 649(0.208) | 12 <sup>1</sup> A''                                                              | 76a'' → 61a''(39); 77a'' → 61a''(23)                                                 | 320(0.866) |
| 1 <sup>1</sup> A'                                                      | 60a'' → 61a''(88)                                                                   | 590(0.249) | 28 <sup>1</sup> A''                                                              | 78a'' → 62a''(60); 77a'' → 62a''(28)                                                 | 258(0.085) |
| 2 <sup>1</sup> A''                                                     | 60a'' → 80a'(91)                                                                    | 460(0.048) | 29 <sup>1</sup> A'                                                               | 60a'' → 64a''(20); 69a'' → 79a'(19);                                                 | 256(0.096) |
| 3 <sup>1</sup> A''                                                     | 60a'' → 81a'(91)                                                                    | 418(0.004) |                                                                                  | 52a'' → 61a''(16); 68a'' → 79a'(10)                                                  |            |
| 2 <sup>1</sup> A'                                                      | 77a'' → 79a'(55); 60a'' → 62a''(24);                                                | 399(0.023) | 31 <sup>1</sup> A'                                                               | 77a'' → 82a'(50); 68a'' → 79a'(15);                                                  | 255(0.106) |
|                                                                        | 78a'' → 79a'(14)                                                                    |            |                                                                                  | 78a'' → 82a'(15)                                                                     |            |
| 8 <sup>1</sup> A'                                                      | 74a'' → 79a'(33); 76a'' → 79a'(23);                                                 | 342(0.362) | 30 <sup>1</sup> A''                                                              | 59a'' → 81a'(41); 53a'' → 79a'(12)                                                   | 254(0.319) |
|                                                                        | 77a'' → 79a'(12)                                                                    |            | 32 <sup>1</sup> A''                                                              | 77a'' → 62a''(52); 78a'' → 62a''(29)                                                 |            |
| 9 <sup>1</sup> A'                                                      | 74a'' → 79a'(45); 57a'' → 61a''(24);                                                | 333(0.266) | 33 <sup>1</sup> A'                                                               | 74a'' → 80a'(30); 76a'' → 81a'(28);                                                  | 252(0.128) |
|                                                                        | 76a'' → 79a'(11)                                                                    |            |                                                                                  | 77a'' → 82a'(10)                                                                     |            |
| 10 <sup>1</sup> A'                                                     | 57a'' → 61a''(64); 76a'' → 79a'(13)                                                 | 326(0.449) |                                                                                  |                                                                                      |            |
| <b>H[TTDPzLi], C<sub>2v</sub> (protonated N<sub>m</sub>)</b>           |                                                                                     |            |                                                                                  |                                                                                      |            |
| 1 <sup>1</sup> B <sub>1</sub>                                          | 12a <sub>2</sub> → 14b <sub>2</sub> (89)                                            | 590(0.362) | 13 <sup>1</sup> B <sub>1</sub>                                                   | 12b <sub>2</sub> → 14a <sub>2</sub> (50); 10b <sub>2</sub> → 13a <sub>2</sub> (39)   | 268(0.145) |
| 1 <sup>1</sup> A <sub>1</sub>                                          | 12a <sub>2</sub> → 13a <sub>2</sub> (89)                                            | 576(0.225) | 15 <sup>1</sup> B <sub>1</sub>                                                   | 10a <sub>2</sub> → 15b <sub>2</sub> (90)                                             | 263(0.170) |
| 7 <sup>1</sup> A <sub>1</sub>                                          | 12b <sub>2</sub> → 14b <sub>2</sub> (59)                                            | 322(1.013) | 14 <sup>1</sup> A <sub>1</sub>                                                   | 11b <sub>2</sub> → 15b <sub>2</sub> (64); 13b <sub>2</sub> → 16b <sub>2</sub> (20)   | 259(0.233) |
| 7 <sup>1</sup> B <sub>1</sub>                                          | 12b <sub>2</sub> → 13a <sub>2</sub> (74)                                            | 317(0.692) | 16 <sup>1</sup> A <sub>1</sub>                                                   | 10a <sub>2</sub> → 14a <sub>2</sub> (73); 11a <sub>2</sub> → 15a <sub>2</sub> (13)   | 256(0.110) |
| 11 <sup>1</sup> A <sub>1</sub>                                         | 10b <sub>2</sub> → 14b <sub>2</sub> (79)                                            | 280(0.115) | 17 <sup>1</sup> B <sub>1</sub>                                                   | 11a <sub>2</sub> → 16b <sub>2</sub> (54); 10b <sub>2</sub> → 13a <sub>2</sub> (18)   | 253(0.215) |
| Term                                                                   | Электронный переход                                                                 | $\lambda$  | Term                                                                             | Электронный переход                                                                  | $\lambda$  |
| <b>[TTDPaH]<sup>-</sup>, C<sub>2v</sub> (protonated N<sub>p</sub>)</b> |                                                                                     |            |                                                                                  |                                                                                      |            |
| 1 <sup>1</sup> B <sub>1</sub>                                          | 10a <sub>2</sub> → 16b <sub>2</sub> (89)                                            | 634(0.162) | 9 <sup>1</sup> B <sub>1</sub>                                                    | 15b <sub>2</sub> → 12a <sub>2</sub> (75); 13b <sub>2</sub> → 11a <sub>2</sub> (17)   | 290(0.547) |
| 1 <sup>1</sup> A <sub>1</sub>                                          | 10a <sub>2</sub> → 11a <sub>2</sub> (84); 15b <sub>2</sub> → 16b <sub>2</sub> (11)  | 569(0.210) | 10 <sup>1</sup> A <sub>1</sub>                                                   | 15b <sub>2</sub> → 19b <sub>2</sub> (88)                                             | 289(0.279) |
| 2 <sup>1</sup> B <sub>1</sub>                                          | 10a <sub>2</sub> → 17b <sub>2</sub> (89)                                            | 480(0.089) | 14 <sup>1</sup> A <sub>1</sub>                                                   | 13b <sub>2</sub> → 17b <sub>2</sub> (51); 14b <sub>2</sub> → 18b <sub>2</sub> (17);  | 264(0.095) |
|                                                                        |                                                                                     |            | 11b <sub>2</sub> → 16b <sub>2</sub> (14)                                         |                                                                                      |            |
| 3 <sup>1</sup> A <sub>1</sub>                                          | 15b <sub>2</sub> → 16b <sub>2</sub> (52); 10a <sub>2</sub> → 12a <sub>2</sub> (17); | 368(0.548) | 15 <sup>1</sup> A <sub>1</sub>                                                   | 13b <sub>2</sub> → 17b <sub>2</sub> (40); 11b <sub>2</sub> → 16b <sub>2</sub> (30)   | 262(0.116) |
|                                                                        | 13b <sub>2</sub> → 16b <sub>2</sub> (10)                                            |            |                                                                                  |                                                                                      |            |
| 5 <sup>1</sup> B <sub>1</sub>                                          | 9a <sub>2</sub> → 16b <sub>2</sub> (40); 15b <sub>2</sub> → 11a <sub>2</sub> (25);  | 362(0.220) | 13 <sup>1</sup> B <sub>1</sub>                                                   | 8a <sub>2</sub> → 16b <sub>2</sub> (78); 11b <sub>2</sub> → 11a <sub>2</sub> (15)    | 262(0.198) |
|                                                                        | 14b <sub>2</sub> → 11a <sub>2</sub> (20)                                            |            |                                                                                  |                                                                                      |            |
| 7 <sup>1</sup> B <sub>1</sub>                                          | 14b <sub>2</sub> → 11a <sub>2</sub> (52); 15b <sub>2</sub> → 11a <sub>2</sub> (30)  | 329(0.216) | 19 <sup>1</sup> A <sub>1</sub>                                                   | 8a <sub>2</sub> → 11a <sub>2</sub> (46); 13b <sub>2</sub> → 18b <sub>2</sub> (17);   | 248(0.098) |
|                                                                        |                                                                                     |            | 14b <sub>2</sub> → 19b <sub>2</sub> (13)                                         |                                                                                      |            |
| 5 <sup>1</sup> A <sub>1</sub>                                          | 13b <sub>2</sub> → 16b <sub>2</sub> (51); 15b <sub>2</sub> → 17b <sub>2</sub> (37)  | 326(0.101) | 18 <sup>1</sup> B <sub>1</sub>                                                   | 7a <sub>2</sub> → 16b <sub>2</sub> (53); 13b <sub>2</sub> → 12a <sub>2</sub> (34)    | 238(0.129) |

|                                                                            |                                                                                                                             |            |                                |                                                                                                                              |            |
|----------------------------------------------------------------------------|-----------------------------------------------------------------------------------------------------------------------------|------------|--------------------------------|------------------------------------------------------------------------------------------------------------------------------|------------|
| 7 <sup>1</sup> A <sub>1</sub>                                              | 15b <sub>2</sub> →17b <sub>2</sub> (44);13b <sub>2</sub> →16b <sub>2</sub> (27)                                             | 309(0.419) | 22 <sup>1</sup> A <sub>1</sub> | 7a <sub>2</sub> →11a <sub>2</sub> (70); 12b <sub>2</sub> →18b <sub>2</sub> (20)                                              | 231(0.085) |
| 8 <sup>1</sup> B <sub>1</sub>                                              | 13b <sub>2</sub> →11a <sub>2</sub> (67); 15b <sub>2</sub> →12a <sub>2</sub> (21)                                            | 307(0.327) |                                |                                                                                                                              |            |
| <b>{H[TTDPaLi]}<sup>-</sup>, C<sub>2v</sub> (protonated N<sub>m</sub>)</b> |                                                                                                                             |            |                                |                                                                                                                              |            |
| 1 <sup>1</sup> A <sub>1</sub>                                              | 12a <sub>2</sub> →13a <sub>2</sub> (85)                                                                                     | 588(0.133) | 8 <sup>1</sup> A <sub>1</sub>  | 11b <sub>2</sub> →14b <sub>2</sub> (66); 12b <sub>2</sub> →14b <sub>2</sub> (10)                                             | 307(0.543) |
| 1 <sup>1</sup> B <sub>1</sub>                                              | 12a <sub>2</sub> →14b <sub>2</sub> (81)                                                                                     | 585(0.323) | 9 <sup>1</sup> B <sub>1</sub>  | 12a <sub>2</sub> →17b <sub>2</sub> (49); 13b <sub>2</sub> →14a <sub>2</sub> (14);<br>12b <sub>2</sub> →13a <sub>2</sub> (13) | 303(0.190) |
| 4 <sup>1</sup> B <sub>1</sub>                                              | 11a <sub>2</sub> →14b <sub>2</sub> (69);13b <sub>2</sub> →13a <sub>2</sub> (20)                                             | 377(0.152) | 10 <sup>1</sup> A <sub>1</sub> | 13b <sub>2</sub> →16b <sub>2</sub> (64); 11a <sub>2</sub> →14a <sub>2</sub> (19)                                             | 292(0.226) |
| 4 <sup>1</sup> A <sub>1</sub>                                              | 13b <sub>2</sub> →14b <sub>2</sub> (40);12b <sub>2</sub> →14b <sub>2</sub> (26);<br>12a <sub>2</sub> →15a <sub>2</sub> (12) | 371(0.283) | 12 <sup>1</sup> B <sub>1</sub> | 11b <sub>2</sub> →13a <sub>2</sub> (70); 13b <sub>2</sub> →15a <sub>2</sub> (11)                                             | 286(0.313) |
| 5 <sup>1</sup> B <sub>1</sub>                                              | 13b <sub>2</sub> →13a <sub>2</sub> (56); 11a <sub>2</sub> →14b <sub>2</sub> (27)                                            | 359(0.155) | 13 <sup>1</sup> B <sub>1</sub> | 12b <sub>2</sub> →14a <sub>2</sub> (93)                                                                                      | 275(0.165) |
| 6 <sup>1</sup> A <sub>1</sub>                                              | 13b <sub>2</sub> →15b <sub>2</sub> (44);12b <sub>2</sub> →14b <sub>2</sub> (31);<br>11b <sub>2</sub> →14b <sub>2</sub> (13) | 343(0.233) | 14 <sup>1</sup> B <sub>1</sub> | 10a <sub>2</sub> →15b <sub>2</sub> (68); 9a <sub>2</sub> →14b <sub>2</sub> (21)                                              | 267(0.184) |
| 7 <sup>1</sup> A <sub>1</sub>                                              | 13b <sub>2</sub> →15b <sub>2</sub> (47);12b <sub>2</sub> →14b <sub>2</sub> (20)                                             | 338(0.189) | 15 <sup>1</sup> B <sub>1</sub> | 11a <sub>2</sub> →16b <sub>2</sub> (47); 9a <sub>2</sub> →14b <sub>2</sub> (28);<br>10a <sub>2</sub> →15b <sub>2</sub> (16)  | 263(0.092) |
| 8 <sup>1</sup> B <sub>1</sub>                                              | 12b <sub>2</sub> →13a <sub>2</sub> (45);12a <sub>2</sub> →17b <sub>2</sub> (27);<br>10a <sub>2</sub> →14b <sub>2</sub> (10) | 311(0.183) | 15 <sup>1</sup> A <sub>1</sub> | 10a <sub>2</sub> →14a <sub>2</sub> (35); 11a <sub>2</sub> →15a <sub>2</sub> (32);<br>10b <sub>2</sub> →14b <sub>2</sub> (14) | 258(0.301) |

a) one-electron transitions between filled and unoccupied MO and their contributions (>10%) to the corresponding electronic configurations of the excited states

b) Electronic configurations of the ground:

[TTDPzLi<sub>2</sub>] ... (19a<sub>1g</sub>)<sup>2</sup>(10a<sub>2g</sub>)<sup>2</sup>(2a<sub>1u</sub>)<sup>2</sup>(6a<sub>2u</sub>)<sup>2</sup>(16b<sub>1g</sub>)<sup>2</sup>(12b<sub>2g</sub>)<sup>2</sup>(2b<sub>1u</sub>)<sup>2</sup>(4b<sub>2u</sub>)<sup>2</sup>(6e<sub>g</sub>)<sup>2</sup>(28e<sub>u</sub>)<sup>2</sup>;

[TTDPaLi]<sup>-</sup> ... (19a<sub>1g</sub>)<sup>2</sup>(10a<sub>2g</sub>)<sup>2</sup>(2a<sub>1u</sub>)<sup>2</sup>(5a<sub>2u</sub>)<sup>2</sup>(16b<sub>1g</sub>)<sup>2</sup>(12b<sub>2g</sub>)<sup>2</sup>(2b<sub>1u</sub>)<sup>2</sup>(4b<sub>2u</sub>)<sup>2</sup>(6e<sub>g</sub>)<sup>2</sup>(28e<sub>u</sub>)<sup>2</sup>;

[TTDPa]<sup>2-</sup> ... (18a<sub>1g</sub>)<sup>2</sup>(10a<sub>2g</sub>)<sup>2</sup>(2a<sub>1u</sub>)<sup>2</sup>(5a<sub>2u</sub>)<sup>2</sup>(16b<sub>1g</sub>)<sup>2</sup>(12b<sub>2g</sub>)<sup>2</sup>(2b<sub>1u</sub>)<sup>2</sup>(4b<sub>2u</sub>)<sup>2</sup>(6e<sub>g</sub>)<sup>2</sup>(28e<sub>u</sub>)<sup>2</sup>;

[TTDPaH]<sub>2</sub> ... (34a<sub>g</sub>)<sup>2</sup>(4a<sub>u</sub>)<sup>2</sup>(22b<sub>1g</sub>)<sup>2</sup>(9b<sub>1u</sub>)<sup>2</sup>(6b<sub>2g</sub>)<sup>2</sup>(28b<sub>2u</sub>)<sup>2</sup>(6b<sub>3g</sub>)<sup>2</sup>(28b<sub>3u</sub>)<sup>2</sup>;

[TTDPaLiH] - C<sub>s</sub> - ... (78a')<sup>2</sup>(60a'')<sup>2</sup>; C<sub>2v</sub> - ... (59a<sub>1</sub>)<sup>2</sup>(12a<sup>2</sup>)<sup>2</sup>(54b<sub>1</sub>)<sup>2</sup>(13b<sub>2</sub>)<sup>2</sup>

[TTDPaH]<sup>-</sup> ... (62a<sub>1</sub>)<sup>2</sup>(10a<sub>2</sub>)<sup>2</sup>(50b<sub>1</sub>)<sup>2</sup>(15b<sub>2</sub>)<sup>2</sup>;

{H[TTDPaH]}<sup>-</sup> ... (58a<sub>1</sub>)<sup>2</sup>(12a<sub>2</sub>)<sup>2</sup>(54b<sub>1</sub>)<sup>2</sup>(13b<sub>2</sub>)<sup>2</sup>

**Table S8.** Calculated frequencies of normal vibrations ( $\text{cm}^{-1}$ ) for  $D_{4h}$  and  $C_{2h}$  geometric configurations of  $[\mu\text{-TTDPaLi}_2]$ .

| $D_{4h}$                    | $C_{2h}$                   | $D_{4h}$                    | $C_{2h}$                    | $D_{4h}$                     | $C_{2h}$                     |
|-----------------------------|----------------------------|-----------------------------|-----------------------------|------------------------------|------------------------------|
| 40i(e <sub>g</sub> )        | 21(b <sub>g</sub> )        | 527(a <sub>2u</sub> , 62.8) | 527(b <sub>u</sub> , 62.8)  | 853(a <sub>1g</sub> )        | 853(a <sub>g</sub> )         |
|                             | 33(a <sub>g</sub> )        | 542(a <sub>1u</sub> )       | 542(a <sub>u</sub> , 0.0)   | 876(e <sub>u</sub> , 45.9)   | 876(a <sub>u</sub> , 22.9)   |
| 15(b <sub>2u</sub> )        | 15(b <sub>u</sub> , 0.0)   | 542(a <sub>1g</sub> )       | 542(a <sub>g</sub> )        |                              | 877(b <sub>u</sub> , 22.6)   |
| 42(a <sub>2u</sub> , 0.2)   | 42(b <sub>u</sub> , 0.2)   | 582(b <sub>1g</sub> )       | 583(a <sub>g</sub> )        | 927(b <sub>2g</sub> )        | 927(b <sub>g</sub> )         |
| 55(b <sub>1u</sub> )        | 55(a <sub>u</sub> , 0.0)   | 590(a <sub>1g</sub> )       | 591(a <sub>g</sub> )        | 1030(b <sub>2g</sub> )       | 1029(b <sub>g</sub> )        |
| 86(e <sub>g</sub> )         | 98(a <sub>g</sub> )        | 608(e <sub>u</sub> , 33.2)  | 608(a <sub>u</sub> , 16.2)  | 1079(e <sub>u</sub> , 3.3)   | 1077(b <sub>u</sub> , 3.4)   |
|                             | 103(b <sub>g</sub> )       |                             | 609(b <sub>u</sub> , 16.2)  |                              | 1080(a <sub>u</sub> , 1.3)   |
| 117(b <sub>2g</sub> )       | 117(b <sub>g</sub> )       | 617(e <sub>g</sub> )        | 617(a <sub>g</sub> )        | 1109(e <sub>u</sub> , 452.4) | 1109(b <sub>u</sub> , 226.9) |
| 121(b <sub>1g</sub> )       | 137(a <sub>g</sub> )       |                             | 617(b <sub>g</sub> )        |                              | 1109(a <sub>u</sub> , 227.4) |
| 128(e <sub>u</sub> , 3.8)   | 128(b <sub>u</sub> , 1.5)  | 622(a <sub>2g</sub> )       | 622(b <sub>g</sub> )        | 1135(a <sub>2g</sub> )       | 1135(b <sub>g</sub> )        |
|                             | 128(a <sub>u</sub> , 2.0)  | 685(b <sub>1u</sub> )       | 684(a <sub>u</sub> , 19.6)  | 1181(a <sub>2g</sub> )       | 1181(b <sub>g</sub> )        |
| 133(b <sub>2u</sub> )       | 133(b <sub>u</sub> , 0.8)  | 687(a <sub>2g</sub> )       | 688(b <sub>g</sub> )        | 1199(b <sub>2g</sub> )       | 1199(b <sub>g</sub> )        |
| 143(e <sub>g</sub> )        | 145(b <sub>g</sub> )       | 691(e <sub>u</sub> , 289.1) | 692(b <sub>u</sub> , 145.2) | 1248(b <sub>1g</sub> )       | 1248(a <sub>g</sub> )        |
|                             | 155(a <sub>g</sub> )       |                             | 692(a <sub>u</sub> , 125.2) | 1272(a <sub>1g</sub> )       | 1272(a <sub>g</sub> )        |
| 148(a <sub>1u</sub> )       | 148(a <sub>u</sub> , 0.0)  | 714(a <sub>1g</sub> )       | 714(a <sub>g</sub> )        | 1279(e <sub>u</sub> , 526.4) | 1278(a <sub>u</sub> , 265.1) |
| 215(a <sub>2u</sub> , 55.3) | 210(b <sub>u</sub> , 60.1) | 731(b <sub>1g</sub> )       | 732(a <sub>g</sub> )        |                              | 1280(b <sub>u</sub> , 269.9) |
| 228(b <sub>2g</sub> )       | 228(b <sub>g</sub> )       | 732(b <sub>2u</sub> )       | 732(b <sub>u</sub> , 0.3)   | 1325(e <sub>u</sub> , 43.5)  | 1325(b <sub>u</sub> , 19.8)  |
| 232(a <sub>1g</sub> )       | 233(a <sub>g</sub> )       | 761(e <sub>g</sub> )        | 761(a <sub>g</sub> )        |                              | 1326(a <sub>u</sub> , 23.2)  |
| 236(a <sub>2g</sub> )       | 236(b <sub>g</sub> )       |                             | 761(b <sub>g</sub> )        | 1346(a <sub>1g</sub> )       | 1346(a <sub>g</sub> )        |
| 265(e <sub>g</sub> )        | 266(a <sub>g</sub> )       | 763(e <sub>u</sub> , 37.6)  | 762(a <sub>u</sub> , 19.4)  | 1364(b <sub>1g</sub> )       | 1364(a <sub>g</sub> )        |
|                             | 266(b <sub>g</sub> )       |                             | 763(b <sub>u</sub> , 19.6)  | 1432(e <sub>u</sub> , 0.2)   | 1431(b <sub>u</sub> , 0.2)   |
| 266(b <sub>2u</sub> )       | 260(b <sub>u</sub> , 4.8)  | 771(b <sub>2g</sub> )       | 772(b <sub>g</sub> )        |                              | 1432(a <sub>u</sub> , 0.1)   |
| 267(e <sub>u</sub> , 32.0)  | 273(a <sub>u</sub> , 7.1)  | 777(a <sub>2u</sub> , 30.6) | 777(b <sub>u</sub> , 30.5)  | 1458(b <sub>1g</sub> )       | 1458(a <sub>g</sub> )        |
|                             | 275(b <sub>u</sub> , 10.4) | 785(e <sub>u</sub> , 80.3)  | 785(b <sub>u</sub> , 41.3)  | 1470(b <sub>2g</sub> )       | 1470(b <sub>g</sub> )        |
| 274(b <sub>1u</sub> )       | 275(a <sub>u</sub> , 1.2)  |                             | 785(a <sub>u</sub> , 40.4)  | 1473(a <sub>1g</sub> )       | 1473(a <sub>g</sub> )        |
| 295(a <sub>2u</sub> , 54.7) | 294(b <sub>u</sub> , 25.1) | 787(b <sub>1g</sub> )       | 787(a <sub>g</sub> )        | 1505(e <sub>u</sub> , 0.7)   | 1505(a <sub>u</sub> , 0.5)   |
| 303(e <sub>u</sub> , 60.6)  | 306(a <sub>u</sub> , 31.7) | 788(a <sub>1g</sub> )       | 788(a <sub>g</sub> )        |                              | 1505(b <sub>u</sub> , 0.7)   |
|                             | 323(b <sub>u</sub> , 44.4) | 800(a <sub>2g</sub> )       | 800(b <sub>g</sub> )        | 1525(a <sub>2g</sub> )       | 1525(b <sub>g</sub> )        |
| 312(e <sub>g</sub> )        | 312(a <sub>g</sub> )       | 820(b <sub>1u</sub> )       | 820(a <sub>u</sub> , 0.0)   | 1537(e <sub>u</sub> , 13.0)  | 1537(a <sub>u</sub> , 6.5)   |
|                             | 312(b <sub>g</sub> )       | 823(e <sub>g</sub> )        | 823(b <sub>g</sub> )        |                              | 1537(b <sub>u</sub> , 6.6)   |
| 352(a <sub>2u</sub> , 2.1)  | 354(b <sub>u</sub> , 5.3)  |                             | 823(a <sub>g</sub> )        | 1562(a <sub>2g</sub> )       | 1562(b <sub>g</sub> )        |
| 512(b <sub>2g</sub> )       | 512(b <sub>g</sub> )       | 823(a <sub>1u</sub> )       | 823(a <sub>u</sub> , 0.0)   | 1562(a <sub>1g</sub> )       | 1562(a <sub>g</sub> )        |
| 518(b <sub>2u</sub> )       | 518(b <sub>u</sub> , 0.0)  | 833(e <sub>u</sub> , 27.4)  | 833(a <sub>u</sub> , 13.2)  | 1572(e <sub>u</sub> , 64.8)  | 1572(b <sub>u</sub> , 32.4)  |
| 519(e <sub>g</sub> )        | 519(a <sub>g</sub> )       |                             | 833(b <sub>u</sub> , 13.0)  |                              | 1572(a <sub>u</sub> , 31.9)  |
|                             | 519(b <sub>g</sub> )       | 843(b <sub>1g</sub> )       | 844(a <sub>g</sub> )        | 1574(b <sub>2g</sub> )       | 1575(b <sub>g</sub> )        |
| 524(e <sub>u</sub> , 5.7)   | 524(a <sub>u</sub> , 2.4)  |                             |                             | 1604(b <sub>1g</sub> )       | 1604(a <sub>g</sub> )        |
|                             | 524(b <sub>u</sub> , 2.6)  |                             |                             |                              |                              |

Symmetry and intensity (km/mol) of IR active vibrations.

$$D_{4h} - \Gamma_{\text{vib}} = 10a_{1g} + 8a_{2g} + 9b_{1g} + 9b_{2g} + 9e_g + 3a_{1u} + 6a_{2u} + 4b_{1u} + 5b_{2u} + 18e_u;$$

$$C_{2h} - \Gamma_{\text{vib}} = 28a_g + 26b_g + 25a_u + 29b_u.$$

**Table S9.** Calculated frequencies of normal vibrations infrared active vibrational modes for anion [TTDPaLi]<sup>-</sup> and [μ-(TTDPa)Li]<sub>2</sub>.

| [TTDPzLi] <sup>-</sup>           |                                                                                                                                                                               | [μ-TTDPaLi] <sub>2</sub>         |                                                                                                                                                                                                                                 |
|----------------------------------|-------------------------------------------------------------------------------------------------------------------------------------------------------------------------------|----------------------------------|---------------------------------------------------------------------------------------------------------------------------------------------------------------------------------------------------------------------------------|
| ω <sub>i</sub> (A <sub>i</sub> ) | Assignment                                                                                                                                                                    | ω <sub>i</sub> (A <sub>i</sub> ) | Assignment                                                                                                                                                                                                                      |
| Symmetry A <sub>2u</sub>         |                                                                                                                                                                               |                                  |                                                                                                                                                                                                                                 |
| 37 (0)                           | dom                                                                                                                                                                           | 42 (0)                           | dom                                                                                                                                                                                                                             |
| 208 (6)                          | fold(C <sub>β</sub> -C <sub>β</sub> )                                                                                                                                         | 215 (55)                         | fold(C <sub>β</sub> -C <sub>β</sub> )                                                                                                                                                                                           |
| 328 (12)                         | fold(C <sub>β</sub> -C <sub>β</sub> ), OPB(Li)                                                                                                                                | 295 (55)                         | fold(C <sub>β</sub> -C <sub>β</sub> ), OPB(Li)                                                                                                                                                                                  |
| 364 (1)                          | OPB(N <sub>m</sub> ), OPB(N <sub>p</sub> ), OPB(Li)                                                                                                                           | 352 (2)                          | OPB(N <sub>m</sub> ), OPB(N <sub>p</sub> ), OPB(Li <sub>2</sub> )                                                                                                                                                               |
| 520 (64)                         | fold(N <sub>t</sub> ···N <sub>t</sub> )                                                                                                                                       | 527 (63)                         | fold(N <sub>t</sub> ···N <sub>t</sub> )                                                                                                                                                                                         |
| 771 (22)                         | fold(C <sub>α</sub> ···C <sub>α</sub> )                                                                                                                                       | 777 (31)                         | fold(C <sub>α</sub> ···C <sub>α</sub> )                                                                                                                                                                                         |
| Symmetry E <sub>u</sub>          |                                                                                                                                                                               |                                  |                                                                                                                                                                                                                                 |
| 129 (7)                          | IPR(Py+TD)                                                                                                                                                                    | 128 (4)                          | IPR(Py+TD)                                                                                                                                                                                                                      |
| 285 (12)                         | r(M-N <sub>p</sub> ), φ(C <sub>α</sub> N <sub>m</sub> C <sub>α</sub> ), φ(N <sub>m</sub> C <sub>α</sub> C <sub>β</sub> )                                                      | 267 (32)                         | r(M-N <sub>p</sub> ), φ(C <sub>α</sub> N <sub>m</sub> C <sub>α</sub> ), φ(N <sub>m</sub> C <sub>α</sub> C <sub>β</sub> )                                                                                                        |
| 467 (2)                          | r(M-N <sub>p</sub> ), IPR(TD)                                                                                                                                                 | 303 (61)                         | r(M-N <sub>p</sub> ), φ(C <sub>α</sub> N <sub>m</sub> C <sub>α</sub> ), φ(N <sub>m</sub> C <sub>α</sub> C <sub>β</sub> )                                                                                                        |
| 526 (3)                          | IPB(Py)                                                                                                                                                                       | 524 (6)                          | IPB(Py)                                                                                                                                                                                                                         |
| 614 (11)                         | φ(C <sub>α</sub> N <sub>m</sub> C <sub>α</sub> ), φ(N <sub>m</sub> C <sub>α</sub> C <sub>β</sub> )                                                                            | 608 (33)                         | φ(C <sub>α</sub> N <sub>m</sub> C <sub>α</sub> ), φ(N <sub>m</sub> C <sub>α</sub> C <sub>β</sub> )                                                                                                                              |
| 690 (421)                        | φ(N <sub>p</sub> C <sub>α</sub> C <sub>β</sub> ), φ(N <sub>m</sub> C <sub>α</sub> C <sub>β</sub> )                                                                            | 691 (289)                        | φ(N <sub>p</sub> C <sub>α</sub> C <sub>β</sub> ), φ(N <sub>m</sub> C <sub>α</sub> C <sub>β</sub> )                                                                                                                              |
| 748 (83)                         | r(S-N <sub>t</sub> ), φ(C <sub>α</sub> N <sub>m</sub> C <sub>α</sub> )                                                                                                        | 763 (38)                         | r(S-N <sub>t</sub> ), φ(C <sub>α</sub> N <sub>m</sub> C <sub>α</sub> )                                                                                                                                                          |
| 764 (124)                        | r(S-N <sub>t</sub> ), φ(C <sub>α</sub> N <sub>m</sub> C <sub>α</sub> ), φ(C <sub>α</sub> C <sub>β</sub> N <sub>t</sub> )                                                      | 785 (80)                         | r(S-N <sub>t</sub> ), φ(C <sub>α</sub> N <sub>m</sub> C <sub>α</sub> ), φ(C <sub>α</sub> C <sub>β</sub> N <sub>t</sub> )                                                                                                        |
| 830 (17)                         | IPB(Py+TD)                                                                                                                                                                    | 833 (27)                         | IPB(Py+TD)                                                                                                                                                                                                                      |
| 881 (21)                         | bre(Py+TD), IPR(Py)                                                                                                                                                           | 876 (46)                         | bre(Py+TD), IPR(Py)                                                                                                                                                                                                             |
| 1083 (175)                       | r(N <sub>p</sub> -C <sub>α</sub> ), φ(N <sub>p</sub> C <sub>α</sub> C <sub>β</sub> )                                                                                          | 1079 (3)                         | r(N <sub>p</sub> -C <sub>α</sub> ), φ(N <sub>p</sub> C <sub>α</sub> C <sub>β</sub> )                                                                                                                                            |
| 1115 (390)                       | r(C <sub>α</sub> -C <sub>β</sub> ), r(C <sub>α</sub> -N <sub>m</sub> ), φ(N <sub>p</sub> C <sub>α</sub> C <sub>β</sub> ),<br>r(C <sub>β</sub> -N <sub>t</sub> )               | 1109 (452)                       | r(C <sub>α</sub> -C <sub>β</sub> ), r(C <sub>α</sub> -N <sub>m</sub> ), φ(N <sub>p</sub> C <sub>α</sub> C <sub>β</sub> ),<br>r(C <sub>β</sub> -N <sub>t</sub> )                                                                 |
| 1278 (726)                       | φ(N <sub>m</sub> C <sub>α</sub> C <sub>β</sub> ), φ(C <sub>α</sub> N <sub>m</sub> C <sub>α</sub> )                                                                            | 1279 (526)                       | φ(N <sub>m</sub> C <sub>α</sub> C <sub>β</sub> ), φ(C <sub>α</sub> N <sub>m</sub> C <sub>α</sub> )                                                                                                                              |
| 1315 (4)                         | r(N <sub>p</sub> -C <sub>α</sub> ), φ(C <sub>α</sub> N <sub>m</sub> C <sub>α</sub> ), φ(N <sub>m</sub> C <sub>α</sub> C <sub>β</sub> )                                        | 1325 (44)                        | r(N <sub>p</sub> -C <sub>α</sub> ), φ(C <sub>α</sub> N <sub>m</sub> C <sub>α</sub> ), φ(N <sub>m</sub> C <sub>α</sub> C <sub>β</sub> ),<br>r(C <sub>α</sub> -C <sub>β</sub> ), φ(N <sub>p</sub> C <sub>α</sub> C <sub>β</sub> ) |
| 1415 (4)                         | φ(N <sub>m</sub> C <sub>α</sub> C <sub>β</sub> ), r(C <sub>β</sub> -N <sub>t</sub> ), r(C <sub>α</sub> -N <sub>m</sub> ),<br>φ(N <sub>p</sub> C <sub>α</sub> C <sub>β</sub> ) | 1432 (0)                         | φ(N <sub>m</sub> C <sub>α</sub> C <sub>β</sub> ), r(C <sub>β</sub> -N <sub>t</sub> ), r(C <sub>α</sub> -N <sub>m</sub> ),<br>φ(N <sub>p</sub> C <sub>α</sub> C <sub>β</sub> )                                                   |
| 1496 (51)                        | r(C <sub>β</sub> -N <sub>t</sub> ), r(C <sub>α</sub> -N <sub>m</sub> ), r(C <sub>α</sub> -C <sub>β</sub> ),<br>φ(N <sub>p</sub> C <sub>α</sub> C <sub>β</sub> )               | 1505 (1)                         | r(C <sub>β</sub> -N <sub>t</sub> ), r(C <sub>α</sub> -N <sub>m</sub> ), r(C <sub>α</sub> -C <sub>β</sub> ),<br>φ(N <sub>p</sub> C <sub>α</sub> C <sub>β</sub> )                                                                 |
| 1530 (59)                        | r(C <sub>α</sub> -N <sub>m</sub> ), φ(N <sub>p</sub> C <sub>α</sub> C <sub>β</sub> )                                                                                          | 1537 (13)                        | r(C <sub>α</sub> -N <sub>m</sub> ), φ(N <sub>p</sub> C <sub>α</sub> C <sub>β</sub> )                                                                                                                                            |
| 1575 (83)                        | r(C <sub>β</sub> -N <sub>t</sub> ), r(C <sub>α</sub> -C <sub>β</sub> )                                                                                                        | 1572 (65)                        | r(C <sub>β</sub> -N <sub>t</sub> ), r(C <sub>α</sub> -C <sub>β</sub> )                                                                                                                                                          |

dom. – doming; fold (X-Y) – folding along X-Y line; OPB - out-of-plane bending, IPR – in-plane rocking; Py – pyrrole ring; TD – thiadiazole ring; r – bond stretching; φ - angle bending; IPB – in-plane bending; bre – breathing

**Table S10.** Calculated frequencies of normal vibrations infrared inactive vibrational modes for anion  $[\text{TTDPaLi}]^-$  and  $[\mu\text{-(TTDPa)Li}]_2$ .

| $\text{TTDPzLi}^-$ | $\text{TTDPzLi}_2$ | $\text{TTDPzLi}^-$ | $\text{TTDPzLi}_2$ | $\text{TTDPzLi}^-$ | $\text{TTDPzLi}_2$ |
|--------------------|--------------------|--------------------|--------------------|--------------------|--------------------|
| Symmetry $A_{1g}$  |                    | Symmetry $B_{1g}$  |                    | Symmetry $A_{2g}$  |                    |
| 230                | 232                | 142                | 121                | 234                | 236                |
| 586                | 542                | 582                | 582                | 615                | 622                |
| 713                | 590                | 733                | 731                | 680                | 687                |
| 769                | 714                | 768                | 787                | 787                | 800                |
| 855                | 788                | 844                | 843                | 1147               | 1135               |
| 1255               | 853                | 1271               | 1248               | 1201               | 1181               |
| 1346               | 1272               | 1337               | 1364               | 1496               | 1525               |
| 1472               | 1346               | 1460               | 1458               | 1569               | 1562               |
| 1542               | 1473               | 1588               | 1604               |                    |                    |
|                    | 1562               |                    |                    |                    |                    |
| Symmetry $B_{2g}$  |                    | Symmetry $E_g$     |                    | Symmetry $B_{2u}$  |                    |
| 111                | 117                | 59                 | $40i^a$            | 16                 | 15                 |
| 210                | 228                | 145                | 86                 | 142                | 133                |
| 507                | 512                | 259                | 143                | 273                | 266                |
| 757                | 771                | 317                | 265                | 508                | 518                |
| 922                | 927                | 509                | 312                | 726                | 732                |
| 1029               | 1030               | 616                | 519                |                    |                    |
| 1217               | 1199               | 755                | 617                |                    |                    |
| 1460               | 1470               | 822                | 761                |                    |                    |
| 1578               | 1574               |                    | 823                |                    |                    |
| Symmetry $A_{1u}$  |                    | Symmetry $B_{1u}$  |                    |                    |                    |
| 152                | 148                | 61                 | 55                 |                    |                    |
| 540                | 542                | 275                | 274                |                    |                    |
| 823                | 823                | 686                | 685                |                    |                    |
|                    |                    | 819                | 820                |                    |                    |

<sup>a</sup> imaginary value

**Table S11.** Total energies (in Hartree) and frontier MO levels (in eV) for the optimized structures of TTDPa macrocycle its Li complex and their anionic forms.

|                                                                     | Total energy, Ha | HOMO, eV | LUMO, eV       |
|---------------------------------------------------------------------|------------------|----------|----------------|
| [TTDPaLi <sub>2</sub> ]<br>(D <sub>4h</sub> )<br>(C <sub>2h</sub> ) | -3093.1708496553 | -5.867   | -3.679         |
| [TTDPaLi] <sup>-</sup>                                              | -3085,5706669461 | -2.865   | -0.514         |
| H[TTDPaLi]                                                          | -3086,1986341181 | -5.965   | -3.831/ -3.570 |
| [TTDPaHLi]                                                          | -3086,1729795300 | -6.038   | -3.946/ -3.761 |
| [TTDPa] <sup>2-</sup>                                               | -3078,0230506409 | 0.302    | 2.746          |
| [TTDPaH] <sup>-</sup>                                               | -3078,6621584073 | -2.912   | -0.688/ -0.473 |
| {H[TTDPa]}                                                          | -3078,6222830330 | -2.767   | -0.558/ -0.294 |
| [TTDPaH <sub>2</sub> ]                                              | -3079,1691980653 | -6.144   | -4.006/ -3.780 |

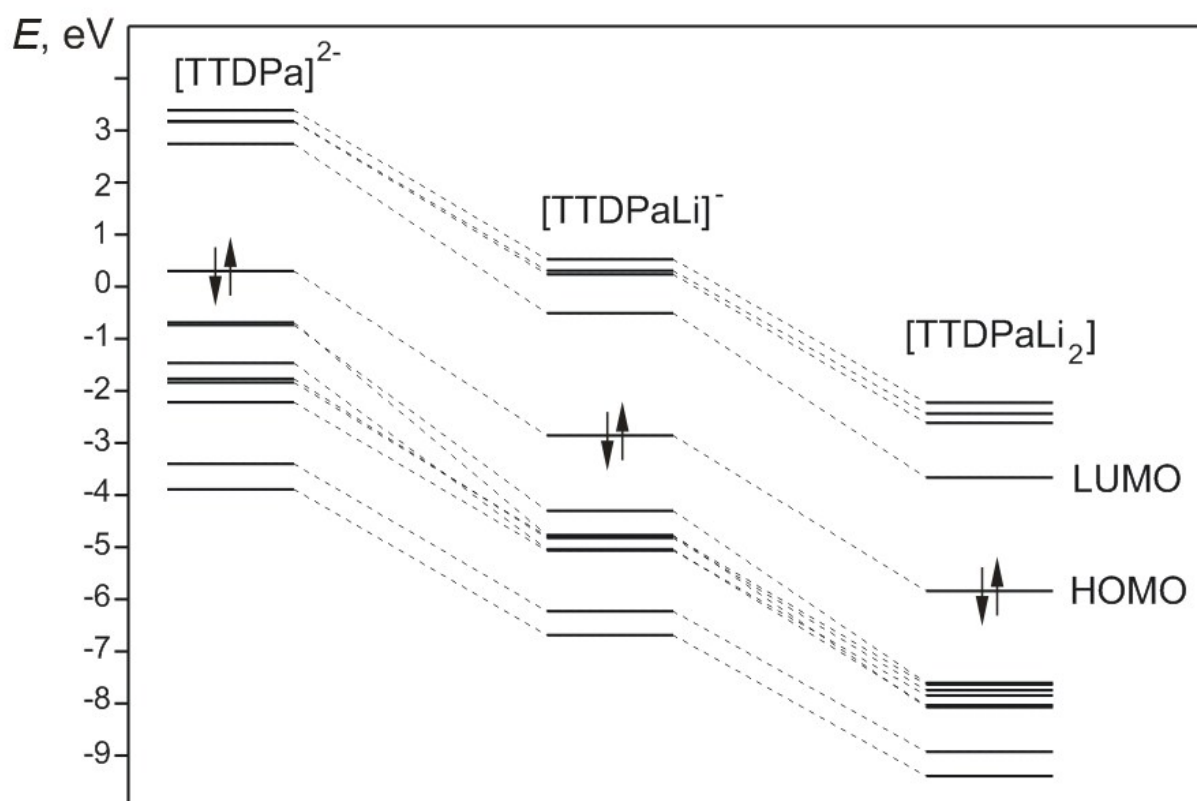

**Figure S1.** MO level diagram for the optimized structures of [TTDPa]<sup>2-</sup> and its mono- and dilithium complexes



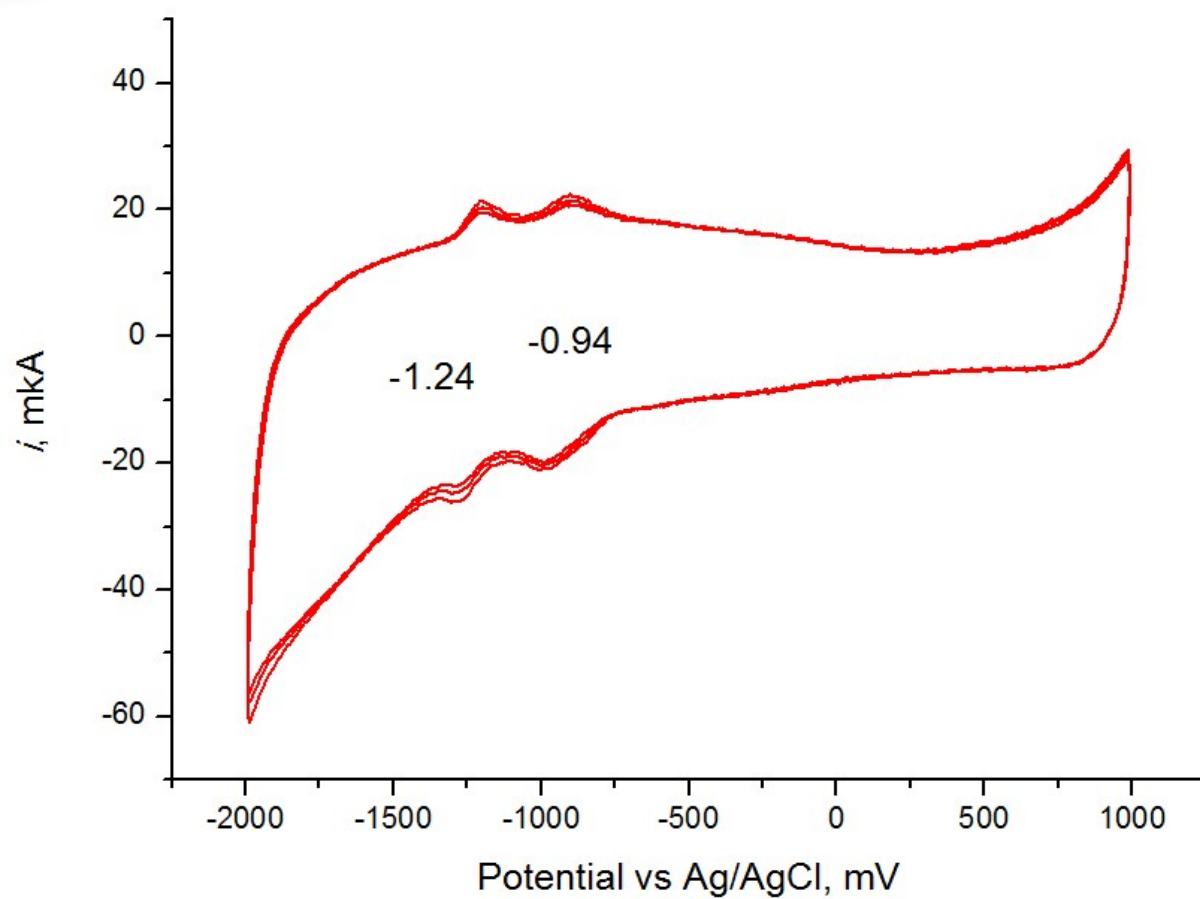

**Figure S2.** Cyclic voltammogram of  $[\text{TTDPaLi}]^-(\text{Li}^+)$  in DMSO in the presence of 0.1 M  $\text{tbaClO}_4$ . Scan rate 100 mV/s.
